# Supplementary material for: A Screen for Small Molecules to Target Candida albicans Biofilms
Source: J Fungi (Basel). 2020 Dec 27;7(1):9. doi: 10.3390/jof7010009 (PMC7824004; doi:10.3390/jof7010009)
Supplement: Supplementary file 1 [file jof-07-00009-s001.zip]

Archive with 7 entries (7 files):
- File S1 - Adherence Inhibition Screen Data 102820.xlsx
- File S2 - Candidate Compound List 102820.xlsx
- File S3 - Compiled Data 102820.xlsx
- Lohse et al Figure S1.tif
- Lohse et al Figure S2.tif
- Lohse et al Figure S3.tif
- Supplemental Figure and File Legends.pdf
