# Supplementary material for: A Screen for Small Molecules to Target Candida albicans Biofilms
Source: J Fungi (Basel). 2020 Dec 27;7(1):9. doi: 10.3390/jof7010009 (PMC7824004; doi:10.3390/jof7010009)
Supplement: Supplementary file 1 [file jof-07-00009-s001.zip › File S1 - Adherence Inhibition Screen Data 102820.xlsx]

## Sheet: File S1
Chembridge Catalog Number	Δ Standard Deviations	B-Score	Candidate Number	List
5100324	0.000936	-0.998
5100352	0.765	-0.841
5100450	1.46	-1.81
5101006	-0.237	1.17
5101081	0.237	-2.52
5101972	0.815	-0.00231
5102149	0.477	-0.223
5102272	0.882	0.0937
5102354	1.31	0.671
5102695	1.48	1.71
5102827	2.21	1.75
5103884	2.61	-0.269
5104019	-0.993	1
5104040	-1.36	0.216
5104333	-2.24	-1.89
5106442	-1.28	0.361
5107151	-1.9	-2.73
5107267	-2.2	-3.35
5107288	-0.852	-1.15
5107296	0.73	0.985
5107324	0.959	1.85
5107743	0.413	0.44
5107952	-0.256	-0.941
5108050	0.79	1.62
5109376	1.37	2.74
5109382	0.973	1.78
5109427	0.857	-1.14
5109439	2.14	-0.0619
5109496	-0.926	0.202
5109527	-1.78	-2.29
5109645	-1.84	-1.53
5109655	-1.12	-0.13
5110018	-1.34	-1.82
5111094	-1.31	-1.28
5111383	-0.842	-2.78
5112751	0.0326	0.917
5114511	0.903	0.555
5114564	-0.827	0.552
5114577	-0.845	0.988
5115474	-1.79	-1.37
5115475	-1.47	-1.33
5115509	0.234	1.21
5116324	-0.221	2.12
5116331	-1.29	-1.18
5117604	-0.0731	0.552
5117742	0.533	-0.735
5118238	-0.295	-0.211
5118823	0.291	1.75
5118936	0.142	1.81
5119598	-0.129	1.83
5121966	-0.439	-0.359
5122041	0.0503	0.44
5125836	0.223	1.48
5125873	0.344	-0.523
5128649	0.656	0.479
5130052	1.5	0.0183
5130345	3.29	4.6
5130435	-1.52	-1.56
5130988	-1.21	0.00713
5132241	-1.54	-0.152
5133068	-1.54	-1.28
5133771	-1.24	-1.15
5133885	-1.67	-2.2
5133914	-0.306	0.0522
5133918	0.618	-0.124
5135105	-0.922	-1.45
5135108	1.02	0.167
5137261	-0.961	-1.08
5137649	-0.397	1.85
5137897	-0.672	-0.212
5138038	-0.358	-0.0295
5138039	-0.827	-1.23
5141796	0.0784	-0.583
5142903	1.23	0.0295
5144054	0.582	0.345
5144059	0.403	0.212
5144139	0.734	2.34
5144485	1.19	2.84
5144506	0.252	0.333
5144518	0.582	-0.212
5144522	1.18	2.33
5144524	0.998	-0.84
5144525	3.09	3.09
5149745	-1.26	-0.0607
5150466	-1.58	-0.662
5152051	-1.17	1.72
5152075	-1.9	-1.92
5152400	-1.07	0.0607
5154263	-0.0455	0.5
5154459	-1.83	-2.15
5154462	-0.39	0.358
5154496	0.383	0.247
5154834	1.12	2.23
5155037	-1.31	0.0145
5156083	-0.261	-1.93
5161060	-1.85	-1.38
5161253	-2.16	-1.5
5161531	-1.17	0.854
5162111	-2.19	-3.63
5163509	-0.222	-1.45
5169012	0.503	-1.31
5169045	2.85	1.67
5170870	1.73	1.76
5172395	-3.32	-7.16	CB1	Bscore (+)
5172618	-0.577	-0.0727
5173872	1.21	2.77
5173945	-0.616	-5.09
5173957	-1.22	-2.68
5174308	-0.419	-0.53
5174871	-0.78	-1.91
5175088	0.981	1.99
5175110	-0.123	0.0314
5175130	-0.864	-2.97
5175191	-0.141	-1.71
5175210	0.654	-0.0314
5175471	0.216	-2.77
5175698	0.0288	-0.186
5175777	-0.16	0.521
5177026	-0.24	-0.714
5177027	-0.0574	-0.0153
5180456	-0.536	-2.42
5180569	0.832	0.904
5181421	0.567	0.0883
5181967	0.242	0.392
5185378	0.74	1.05
5185476	0.753	0.841
5185664	1.63	2.84
5186496	1.32	0.0262
5190503	0.836	-1.07
5191690	0.0338	-0.179
5192906	1.94	-2.54
5193586	-0.634	-3.66
5195073	-0.615	0.316
5195097	-0.0501	-1.43
5195108	-2.06	-1.91
5195204	0.596	0.476
5209101	-0.0392	-2.12
5210096	0.975	0.253
5210582	0.921	-1.32
5210666	0.138	-0.328
5211740	0.614	1.83
5211824	0.529	2.5
5212522	0.473	1.2
5212809	0.987	2.09
5213858	0.36	0.328
5214085	-2.14	-0.986
5216376	1.39	1.41
5217335	0.734	-4.29
5217352	-0.154	-0.249
5217374	-0.855	-2.21
5217451	-0.115	1.35
5218408	-0.112	0.257
5219940	-0.454	-1.85
5220107	0.0397	0.309
5220735	0.0644	-2.12
5222000	-1.16	0.725
5222079	1.36	-0.982
5222091	-0.894	-3.31
5222099	-0.182	-0.325
5223107	0.0608	1.49
5224020	-0.0625	-0.0436
5225629	-0.334	-1.91
5226020	0.558	1.65
5228005	0.149	-2.3
5228159	2.09	1.07
5228293	-2.49	-3.88
5228667	1.42	1.67
5228759	-1.57	-0.261
5229220	0.847	0.155
5230128	0.519	-0.0289
5230714	0.85	0.0289
5230997	0.269	-2.92
5231586	-0.0202	-3.5
5234067	1.47	-0.799
5235117	2.69	0.0605
5236212	0.665	0.101
5236820	-0.948	-1.35
5237501	-1.15	-3.03
5238095	-0.995	-2.46
5240471	-0.689	-1.85
5240997	-0.309	-0.568
5243229	-0.484	1.17
5243230	0.319	0.328
5244439	0.659	-0.16
5244667	1.34	2.88
5245514	-0.58	0.761
5245587	-1.63	-0.0608
5245669	-1.98	-0.0846
5245688	-1.94	-1.72
5245748	0.366	-1.52
5245872	-1.12	1.32
5246035	-0.776	-1.17
5246248	-1.45	0.476
5246751	-1.29	-1.41
5246798	-0.218	0.0452
5246821	0.609	-0.0188
5246844	-0.0667	-1.43
5246848	-0.845	-1.28
5246851	-0.665	0.593
5248266	-0.86	-1.89
5248991	-0.769	-2.06
5250784	0.107	0.719
5250822	-0.332	0.133
5251159	-0.375	-1.29
5251400	0.162	-0.747
5251423	0.851	0.53
5253923	-0.753	-1.04
5256678	0.354	0.468
5256691	1.98	0.862
5256698	1.48	2
5256797	-0.897	-2.37
5256911	-0.43	-1.51
5257045	0.162	0.757
5257081	0.516	1.54
5257131	-0.127	-1.09
5257355	0.497	-0.203
5257389	0.483	-1.62
5257560	1.33	0.0203
5257587	0.0594	-0.101
5257640	0.797	1.79
5257839	1.61	1.12
5258096	-0.112	-1.68
5258437	-0.0392	-1.98
5258444	0.866	1.32
5258505	0.676	-0.912
5258729	0.502	1.17
5258791	0.22	-4.02
5258934	1.54	0.456
5259270	-0.0757	-1.02
5259321	0.22	-0.816
5259329	0.355	-0.299
5259437	1.11	2.01
5259558	0.41	-0.828
5259601	1.01	-0.0437
5259629	0.151	-4.69
5259640	-0.0173	-0.0642
5259946	-1.24	-0.0175
5260099	-0.908	0.327
5260194	-0.871	0.467
5260279	-0.813	0.12
5260352	-0.525	1.06
5260397	0.11	1.98
5260566	-1.09	-3.98
5260594	-0.492	-1.97
5260799	-0.838	1.43
5261180	-0.433	2.06
5261209	-0.605	1.4
5261224	-0.93	-0.412
5261253	-0.7	0.3
5261691	-0.674	-1.11
5261717	0.18	0.797
5261839	-0.397	-1.01
5261918	-1.27	0.36
5261923	-0.55	2.2
5262229	-1.2	-0.302
5262263	-0.897	0.302
5262610	-0.82	0.427
5262922	-0.0465	1.88
5263012	2.37	9.75
5263088	1.35	0.0609
5263207	1.31	4.62
5263663	0.439	0.368
5263696	0.14	-0.778
5263735	0.443	-0.188
5263839	0.377	-0.608
5263875	0.833	-0.369
5263973	0.866	-1.61
5264030	2.08	1.08
5264135	0.556	-0.0336
5264304	-0.342	-4.4
5264342	1.65	3.22
5264376	-0.523	-0.744
5264812	0.881	-0.288
5264819	1.28	1.07
5264882	1.39	-0.00699
5265546	1.04	-2.7
5265592	-0.123	0.0175
5265658	1.42	0.803
5265852	0.0748	-0.392
5266178	-1.36	0.0083
5266432	-1.32	-0.752
5266501	-0.868	0.968
5267053	-1.86	-3.42
5267242	-0.736	0.732
5267346	-0.594	-0.231
5267666	-0.0246	0.586
5267750	-1.57	-2.8
5268038	-0.747	0.0177
5268250	-1.7	-3.36
5268263	-0.293	1.22
5268267	-0.916	0.22
5268315	-0.557	-0.0177
5268328	-0.083	1.27
5268388	0.246	4.27
5268409	1.64	5.58
5268522	2.26	3.19
5268553	-1.82	-4.21
5268847	0.541	4.48
5269009	-0.16	2.06
5269476	-0.441	-0.0452
5269691	0.505	3.05
5269794	-0.43	1.21
5270526	0.428	0.466
5270554	1.46	-0.342
5270642	-0.937	-0.654
5270697	-0.346	1.27
5270729	-0.55	0.759
5270804	-0.072	1.56
5271316	-0.324	0.069
5271547	-0.207	2.25
5272779	0.833	2.21
5272965	2.04	2.04
5274998	2.47	5.32
5275422	0.0776	0.881
5275672	0.0557	-0.131
5275858	0.118	0.107
5276323	0.194	-0.17
5278671	0.121	-0.618
5279717	1.06	1.45
5280837	1	-0.107
5281251	0.943	0.0277
5281945	0.00463	1.16
5282133	0.0448	0.391
5284574	-0.0903	-0.126
5286139	-0.174	-1.02
5302836	-0.106	1.34
5303668	0.578	1.69
5304020	0.932	1.54
5305312	-0.704	-0.672
5306005	-1.04	-1.53
5306273	0.917	0.121
5306555	0.397	1.15
5307045	2.18	1.65
5307372	0.943	1.65
5308402	1.99	4.75
5308542	0.337	-1.6
5309181	0.848	-0.21
5309400	0.979	0.125
5309833	1.31	-0.125
5310698	1.98	1.08
5311051	0.129	-0.837
5311088	-0.645	0.929
5311548	2.64	3.76
5311852	2.25	4.58
5313120	-0.0976	2.1
5313583	-0.284	1.38
5314481	-0.0903	1.55
5315736	0.853	2.67
5316266	-0.258	0.0794
5317746	-0.452	0.00328
5317886	0.074	0.508
5322531	0.297	-0.00328
5322780	0.238	0.28
5324017	-0.399	-1.36
5324498	-0.601	1.79
5325361	-0.846	-0.0694
5325883	-0.404	1.62
5325940	0.0484	2.78
5326640	-0.24	1.51
5327467	-0.488	-0.946
5328592	0.643	2.02
5329440	1.34	2.5
5330403	0.0536	-0.783
5330459	-0.616	-0.272
5332677	0.118	1.61
5333525	-0.0455	-0.736
5334960	-0.329	-1.76
5335294	0.479	2.99
5337510	0.198	1.35
5338822	0.8	0.467
5338865	-0.185	-0.289
5339691	0.355	0.272
5339760	2.26	1.64
5339881	0.319	-1.23
5339894	-0.612	-0.279
5339932	1.42	1.75
5340035	-0.959	-1.94
5340182	-0.517	0.0153
5341211	0.154	1.56
5341232	-0.707	-2.27
5341423	-0.674	-0.403
5341862	0.592	0.419
5342806	2.18	1.72
5343031	1.15	2.16
5343258	-0.473	-1.19
5343422	0.227	1.16
5343579	0.0886	0.895
5343645	0.169	0.173
5343704	0.37	0.415
5343904	1.14	1.21
5344035	-0.2	-0.0262
5344139	0.724	-0.517
5344487	3.38	4.86
5344709	-0.51	0.0463
5344866	-0.557	-0.472
5344878	-0.317	0.718
5344943	-0.247	-0.0463
5345100	0.811	3.48
5345322	-0.167	1.47
5345917	0.552	0.2
5346250	1.58	-0.637
5346548	-2.21	-2.89
5346786	-2.33	-3.7
5347231	1.4	1.07
5347355	-1.52	-0.3
5347441	0.977	-0.0353
5347923	-0.762	1.56
5347996	-1.56	-2.01
5348175	-1.7	-0.802
5348362	-1.96	-1.32
5348578	-1.63	-0.413
5348650	-1.67	-0.313
5349020	-1.57	-0.951
5349423	-1.58	-1.52
5349442	-2.23	-2.24
5349576	0.652	-1.21
5349686	0.289	3.36
5349972	1.98	5.07
5350059	-1.35	-0.849
5350146	-0.568	1.82
5350355	-0.922	0.731
5350435	-0.984	-0.536
5350801	-0.733	-0.0985
5351021	-1.4	-0.917
5351320	0.889	-2.18
5351631	-0.201	-3.86
5351769	-0.174	-0.249
5352108	1.05	-0.344
5352372	0.26	1.6
5352400	0.0849	0.594
5352437	0.297	1.67
5352975	0.0484	-0.308
5353065	0.855	2.25
5353500	0.063	0.96
5354313	0.859	-0.0203
5354801	0.866	-4.77
5355919	0.308	1.38
5356655	0.121	0.331
5356721	-0.273	-0.911
5356987	0.422	1.3
5357305	0.246	0.0437
5357934	0.26	-0.427
5358259	0.932	3.88
5358284	0.983	0.052
5358364	2.24	0.0821
5359035	0.494	2.44
5359372	-0.29	-0.0139
5359733	0.461	0.887
5360024	-0.0684	-0.0504
5363579	0.149	-0.0943
5364823	0.584	1.8
5366595	1.05	1
5367966	2.29	0.0139
5373281	0.118	0.93
5373293	0.479	1.28
5373357	0.472	0.729
5373369	-0.16	0.0504
5373448	0.621	-0.986
5373651	1.67	-1.74
5379038	1.21	3.41
5380328	-0.428	-3
5398276	0.0995	-1.18
5398361	-0.072	-1.57
5404113	1.58	3.73
5406174	1.11	1.4
5406291	1.69	5.36
5410097	-0.0986	1.1
5410907	1.12	-0.862
5411187	2.59	0.00699
5411311	-1.41	0.76
5412031	-2.62	-4.23
5412159	-0.757	-0.0218
5412209	-2.08	-1.87
5412567	-1.17	0.555
5412869	0.634	3.17
5413011	-2.12	-3.58
5413181	-1.63	0.00699
5413387	-0.612	-0.107
5414720	0.662	-0.00699
5415001	-1.6	-0.454
5415432	-2.28	-3.4
5416125	-1.86	-1.51
5416611	-1.65	-1.75
5417152	-1.05	0.0175
5417222	-1.78	-1.02
5418134	-0.437	0.0769
5418585	1.77	3.75
5418745	-1.71	-1.52
5418934	-1.22	0.0153
5419414	-1.34	-0.178
5419679	-0.868	0.609
5420652	-0.893	-0.0153
5420769	-1.41	-0.247
5420931	-0.338	-0.179
5421039	0.315	-2.46
5421048	-0.422	1.4
5421194	-0.933	-0.891
5421235	-0.207	2.16
5421370	-0.882	-1.46
5421562	0.118	1.85
5422146	-1.01	-0.72
5422291	0.39	2.43
5422303	0.393	2.78
5422317	-0.729	-3.68
5422345	1.27	-0.804
5422453	-0.0246	1.42
5422689	-0.214	0.359
5422868	-0.532	-0.589
5422914	-0.554	-1.7
5423224	-0.317	-1.32
5423500	-0.185	0.921
5423562	0.724	0.374
5423624	1.34	-2.06
5423677	0.308	-0.352
5423702	-0.268	-0.305
5423806	0.694	1.4
5424036	0.267	0.738
5424123	0.709	1.69
5424310	2.05	0.817
5424860	-0.316	-0.867
5425106	-0.48	-2.05
5425160	-0.0622	-1.7
5425503	1.42	1.29
5425758	0.0714	-1.01
5425829	0.147	1.36
5426358	0.0748	0.238
5426360	0.955	2.75
5426433	-0.0491	0.517
5426694	-0.165	-0.146
5426824	-0.237	-1
5426917	-0.353	-2.55
5427385	1.38	1.33
5427724	-0.336	-3.81
5427761	0.267	0.44
5427947	-1.23	-0.629
5428081	-1.39	0.19
5428265	-1.23	-0.17
5428317	-1.07	-0.622
5428650	-0.962	0.16
5428864	0.133	-0.897
5429188	-0.586	-4.09
5429506	0.75	1.77
5429689	1.36	3.34
5429724	0.277	-1.65
5429816	0.568	-2.91
5429876	0.18	2.77
5430476	-0.463	-0.0277
5430747	-0.433	0.352
5431041	-0.565	-1.18
5431107	-0.525	-1.55
5431347	-1.01	-1.69
5431871	-0.12	3.17
5452134	-0.0903	-2.18
5452220	0.979	-2.86
5452344	0.829	2.15
5452347	0.902	2.09
5452494	-0.189	-1.82
5452546	0.153	2.33
5452643	-0.00304	1
5452929	0.311	-0.932
5453223	0.11	-2.23
5453765	0.173	-0.251
5453864	-1.14	0.0188
5453984	1.07	-0.84
5454057	2.69	0.602
5454326	-1.8	-0.937
5454460	0.321	1.57
5455705	-1.31	-2.14
5455710	-1.59	-4.01
5456382	-1.09	-2.87
5457010	-1.47	-0.701
5457087	0.655	0.374
5458098	-0.788	-0.683
5458206	-0.473	-0.16
5458790	0.962	3.82
5459084	1.14	2.17
5459879	-0.316	-1.05
5460082	-1.05	-1.57
5460161	-0.792	-1.51
5460613	-0.682	-1.74
5461088	0.832	4.75
5461827	0.219	1.97
5462116	0.52	1.91
5463110	0.64	0.0341
5465523	-0.114	0.00134
5465567	-0.908	-0.733
5466084	-0.552	-0.325
5466100	-0.679	-1.4
5467116	-0.593	-0.00134
5467706	0.0954	1.85
5467784	-0.428	-0.575
5468307	-1.04	-1.52
5468431	-0.0774	0.124
5468550	0.383	1.91
5468907	0.0303	0.487
5468951	0.236	-1.08
5469336	0.00629	-0.722
5469761	-0.605	-1.29
5469799	-0.501	-0.431
5470071	0.715	0.975
5470125	0.106	0.869
5470864	2.72	2.71
5471501	0.574	0.685
5471954	-0.467	-0.111
5472518	0.26	0.792
5473456	-0.679	-1.46
5474230	-0.891	-2.81
5474955	-0.867	-0.313
5476271	0.318	0.362
5476313	-0.537	-0.921
5476496	0.107	1.52
5477376	0.873	0.0401
5478476	-1.35	-0.812
5479714	-0.353	0.21
5479877	-2.16	-1.58
5480255	0.0748	-0.717
5483126	-1.98	-1.81
5484017	-1.3	0.00591
5491560	1.48	-1.1
5491684	-1.73	-0.461
5509739	-1	1.54
5510101	-0.919	0.712
5510937	0.178	2.32
5521718	-0.764	0.393
5521760	-1.49	-0.0977
5521848	-1.8	-2.05
5522603	-1.49	-1.6
5523610	-0.453	3.21
5523673	-1.42	-0.845
5523999	-0.84	0.0977
5524440	0.208	1.53
5525378	-0.699	0.564
5525913	0.868	0.0939
5527156	-1.83	-1.38
5527239	-1.23	-0.0799
5527330	-0.559	-1.91
5527525	-0.49	1.92
5527770	-1.57	-0.819
5530084	-0.438	-0.0939
5530128	-0.795	1.33
5531459	-0.521	1.17
5534198	-0.378	-0.809
5534362	-0.141	0.227
5534523	0.911	0.962
5535111	0.4	1.24
5538411	-0.028	-1.15
5538481	0.471	1.19
5540277	0.243	-0.808
5541245	0.325	0.581
5543419	0.524	0.689
5545329	0.715	0.24
5545642	0.839	-1.62
5545892	0.917	0.41
5546075	0.177	0.536
5546675	-0.0656	-0.996
5547053	0.804	1.24
5547834	0.715	0.3
5548152	-0.0384	-0.245
5548834	1.07	1.9
5549289	1.23	1.03
5549399	0.818	1.76
5549724	-0.042	-0.437
5551581	-0.261	0.167
5551608	-0.0554	-1.95
5552142	-0.155	-3.44
5553998	1.29	-0.586
5554511	-0.339	-1.04
5554817	1.24	-0.0431
5555799	1.1	1.57
5556396	0.407	-1.77
5556487	1.1	0.079
5559350	1.26	1.74
5560599	1.96	3.63
5561021	0.255	0.0394
5561850	0.28	0.53
5561984	0.41	-3.02
5563267	0.774	-4.03
5564452	-0.329	-0.0219
5564645	-0.0384	-0.618
5566460	-0.689	0.794
5568729	-0.627	0.152
5568834	-0.809	-1.12
5569521	0.326	-1.13
5569909	-1.17	-1.29
5571104	-1.23	-2.14
5572175	0.323	1.11
5574397	-0.261	2.12
5574752	0.133	1.6
5575177	0.846	1.84
5576595	-0.405	-0.167
5576811	-1.64	-1.42
5585745	-0.442	1.8
5592045	-1.35	-2.3
5592050	-0.405	0.443
5592051	-0.86	-0.0843
5607638	-0.192	1.7
5611774	-0.316	0.124
5620178	-0.233	2.68
5620542	-0.431	0.927
5620736	0.393	0.351
5622971	-0.81	-0.0281
5624280	-1.04	-4.39
5624510	-1.06	-0.935
5624730	0.861	4.13
5625000	2.63	7.62
5627149	-0.22	0.636
5627219	0.493	2.31
5627541	0.154	0.48
5627786	-0.333	-0.158
5628081	-0.166	0.691
5628144	-0.0759	0.158
5631119	-0.405	-2.15
5631760	0.955	0.399
5632309	-0.527	0.787
5637835	0.469	0.735
5644575	-0.312	0.049
5647299	-0.0597	1.53
5648233	0.469	1.97
5648655	-0.799	-3.17
5648873	-0.203	0.0486
5650164	-0.302	-0.905
5651440	0.229	-0.146
5651799	0.53	-1.37
5652095	-1.51	-0.00591
5652928	-2.59	-3.76
5653558	-2.95	-3.71
5653685	-1.25	0.971
5655383	-1.58	0.0124
5656212	-1.68	-0.0795
5656777	0.22	1.48
5657508	-0.000557	3.97
5657842	-0.428	-0.434
5658720	1.47	2.59
5659295	-1.32	-0.229
5659877	-1.52	-0.845
5660568	-0.431	-0.454
5660632	-1.59	0.22
5661155	-0.497	2.75
5661396	0.248	0.16
5661988	-0.605	-1.42
5662445	-1.99	-2.36
5663386	-1.5	-0.364
5663477	-1.16	-0.481
5664169	-0.812	0.183
5664939	1.39	1.39
5666316	-0.347	0.213
5667119	-0.518	-0.293
5667449	-1.38	-2.05
5669377	-0.261	0.555
5671760	0.0268	1.79
5674579	0.226	2.76
5674727	-0.817	1.98
5676048	-0.0211	-0.0341
5677970	1.41	-1.55
5679147	-1.08	-0.758
5680320	-0.782	-0.997
5682518	0.143	2.4
5685294	-1.05	-0.523
5686075	-0.514	-0.00801
5686738	-0.449	0.437
5687134	-0.629	1
5687476	-0.605	1.43
5687727	-0.346	2.28
5688125	-1.41	-1.13
5688297	0.109	2.69
5689945	-0.0348	0.258
5690318	1.76	0.00801
5690795	0.02	-0.844
5690922	0.321	0.335
5691072	-0.76	1.19
5691302	-0.439	-1.07
5691309	-0.374	-2.21
5691429	0.119	-0.24
5691608	1.03	5.78
5691919	0.277	1.64
5692564	-0.0382	-0.539
5693020	-1.59	-1.94
5693319	-1.9	-1.68
5694414	0.856	0.728
5695366	2.96	1.6
5695753	-1.12	0.206
5696137	0.688	0.977
5696587	-1.77	-3.16
5697193	-0.264	-0.319
5697608	-0.952	0.156
5698254	-0.86	0.478
5698255	0.222	0.553
5699341	0.751	4.43
5700253	0.117	0.0798
5701026	-0.867	-0.344
5701088	-0.693	1.67
5701615	-0.601	1.07
5701850	-0.499	0.386
5703759	-1.33	-2.19
5704056	-0.368	1.25
5704269	0.981	4.26
5705214	-0.312	-1.98
5705269	0.637	2.5
5705272	-0.722	-0.798
5705309	0.243	0.497
5706714	-1.31	0.0281
5708213	-1.88	-0.794
5709699	-1.09	0.246
5716665	-0.838	1.29
5721589	-1.74	-1.62
5728429	-0.162	-2.08
5729282	-1.04	-1.57
5729548	0.842	-0.8
5730316	0.34	-2.03
5731919	-0.283	-1
5732182	-1.63	-1.39
5735757	-0.711	0.395
5737088	-0.937	0.815
5737315	-0.711	-0.16
5737471	-0.856	-0.546
5737818	-1.62	-1.26
5738028	-0.973	-0.627
5738456	-1.62	0.049
5739150	-1.39	-0.51
5740840	-2.35	-3.69
5742128	-1.01	1.34
5745468	-0.86	-0.049
5747226	-0.47	-1.29
5748560	0.861	-1.95
5753429	2.47	1.88
5753866	1.15	0.495
5757469	-0.627	0.284
5759673	-0.73	0.0219
5760801	-1.59	-1.75
5761928	2.03	4.13
5763712	0.162	-1
5764711	0.892	0.246
5768311	0.555	-1.28
5777587	0.725	-0.484
5785336	0.84	-1.3
5785852	-1.33	-2.18
5785861	1.43	-0.246
5787020	-1.59	-2.9
5787030	-1.77	-3.29
5787323	0.243	1.98
5789463	0.779	-0.0808
5790592	2.14	2.12
5791668	0.917	1.16
5791787	0.0217	0.137
5793002	-0.619	-0.927
5794624	0.373	1.32
5795316	0.131	-0.0261
5795665	0.236	-0.0324
5801584	1.08	2.33
5807054	0.325	0.755
5807083	0.0268	-0.907
5807107	-0.264	-3.08
5807489	0.835	-1.46
5807736	0.949	3.04
5808563	0.05	0.154
5809328	0.452	0.117
5809505	1.33	2.29
5809583	-0.0485	-1.56
5812688	0.503	1.71
5813628	0.465	0.203
5828915	1.66	-1.96
5830468	0.383	0.123
5832429	-0.00741	-1.01
5836555	0.78	-0.117
5836592	2.08	-2.11
5838677	1.49	3.19
5839477	-0.364	-0.514
5841031	-0.499	-0.287
5843265	-0.792	-0.106
5844813	-0.99	-0.034
5845395	-0.819	-0.631
5845942	0.114	2.1
5846500	0.0746	2.5
5848125	-0.934	-0.854
5848275	1.22	1.57
5848750	1.27	4.09
5849143	0.172	0.229
5849154	2.18	1.63
5851511	-0.086	1.01
5855137	-0.669	-0.632
5855416	-0.943	-0.326
5856847	1.08	4.33
5856995	-0.774	-0.658
5857006	-0.785	0.0356
5858495	-0.463	-1.5
5860351	-1.13	-2.28
5860828	-0.321	-0.134
5862214	-0.774	-0.92
5864596	0.12	2.02
5865364	0.276	-0.0356
5869918	-0.698	-2.78
5870409	-0.456	0.495
5871258	1.85	-0.091
5875960	0.298	0.0726
5876414	1.55	1.05
5876567	1.28	4.36
5879961	-0.0577	1.4
5880162	-0.718	-0.637
5880381	0.519	-2.43
5882347	0.00589	-1.13
5910008	0.552	1.57
5910823	-0.114	-1.82
5912964	0.532	0.688
5914549	-0.054	-2.19
5915384	0.549	-0.77
5916300	1.45	-0.0162
5917210	-0.844	-1.56
5917225	-0.192	0.116
5918769	-0.357	-0.0737
5921966	-0.552	0.558
5922387	-0.889	0.17
5923708	-0.29	-0.467
5924771	-0.00864	-1.24
5925765	-0.806	-0.714
5925811	-0.336	1.01
5926400	-0.969	-1.1
5927483	-0.0194	-0.534
5927591	1.72	-0.0144
5927835	0.639	-3.35
5927987	-1.39	-2.33
5929040	1.28	2.22
5930362	-0.747	0.0843
5932336	-1.42	-1.01
5934457	-0.949	-0.703
5936502	0.0525	0.968
5936522	-0.651	0.572
5936529	-0.71	-1.02
5938469	-1.31	-1.5
5941331	-0.0774	0.242
5957448	0.212	1.47
5960575	-0.0341	-0.192
5986130	-0.121	-1.24
5986307	-0.717	-0.205
6001392	0.569	-1.25
6011756	-0.22	0.453
6013783	0.815	-0.585
6014881	0.404	-3.96
6017066	-0.638	-1.58
6018758	0.0234	0.878
6025799	-0.497	0.331
6030410	0.605	1.8
6031896	-0.234	-0.458
6033526	0.109	-0.234
6033651	0.102	-0.0637
6033999	-0.987	-2.79
6035289	-0.764	-1.78
6035430	-0.141	0.699
6036699	0.472	0.477
6036890	-0.367	-2.03
6039392	1.63	-1.54
6040698	0.625	0.291
6043622	-0.191	-5.11
6043920	-0.00398	0.418
6045359	0.864	2.71
6045525	-0.357	-0.183
6045877	-0.162	1.19
6046226	0.774	3.12
6047920	-1.4	-4.46
6048133	-0.0759	1.58
6049580	-0.864	-2.61
6050031	0.424	2.19
6050731	-0.357	-0.445
6051889	-0.165	0.174
6052345	-0.652	-0.779
6052607	-0.542	-0.986
6052636	-0.732	-4.28
6056216	1.59	-1.85
6057009	0.26	-0.0486
6062078	2.35	0.776
6068392	-0.124	-1.86
6068804	-0.249	-2.25
6071121	-1.12	-2.28
6071993	-1.26	-3.55
6072125	-0.827	-0.497
6072545	-0.525	1.49
6072916	-0.833	-1.53
6073532	-0.282	0.8
6074145	-0.295	1.38
6074556	-0.138	1.45
6075475	0.126	0.581
6076296	-0.27	0.683
6078739	-0.00743	0.843
6078839	1.04	-0.148
6079994	0.403	0.442
6080413	-0.0757	-3.37
6080569	-1.07	-4.6
6082722	-0.576	-0.768
6083740	-0.68	-3.21
6084518	-0.201	-0.584
6085837	0.669	0.0511
6086658	-0.504	-1.67
6087115	0.0197	0.253
6087121	0.838	2.2
6087297	1.62	0.778
6089332	-0.793	-4.42
6100291	-0.387	0.173
6100615	-0.282	-2.92
6101186	-0.91	-0.955
6104664	-0.743	-1.36
6109266	-2.15	-8.58	CB2	Bscore (+)
6109305	-0.62	-0.728
6109447	-0.084	0.409
6109813	-0.798	-0.393
6109867	-0.0241	-0.111
6110806	0.252	-1.6
6112725	1.83	3.5
6115154	-0.788	-0.855
6115251	-0.734	-1.98
6119665	1.23	2.66
6120311	0.0378	2.58
6121702	-0.225	0.51
6121737	0.93	2.4
6123261	0.582	0.0872
6123948	0.18	0.364
6124449	0.638	0.441
6127314	0.207	-0.999
6127409	0.928	-1.23
6127889	0.928	3.2
6129895	0.889	-1.32
6130804	1.7	-3.88
6130934	0.208	0.74
6131257	-0.192	0.621
6131318	1.43	2.04
6131679	0.586	0.404
6132233	0.607	1.2
6132304	0.937	1.13
6132454	0.662	0.395
6136325	-0.196	-0.768
6139194	0.0405	0.288
6141470	0.447	-0.332
6141476	-0.518	-1.44
6141901	0.215	-0.746
6143032	2.21	-0.288
6148443	0.633	1.51
6167047	0.847	-1.59
6167271	1.66	-4.15
6168232	-1.4	0.235
6168866	0.188	0.0324
6169427	0.0337	0.792
6170305	-1.95	-0.412
6171231	-2.21	-0.57
6172307	1.02	2.94
6172837	-1.16	1.77
6175257	-2.53	-2.62
6178161	-2.11	-1.23
6178231	0.0189	3.24
6178604	-0.453	-2.1
6178738	2.11	4.9
6179306	1.17	1.5
6179726	-0.617	-2.43
6180667	-0.155	0.81
6181058	-0.504	-3.94
6181066	-0.917	-0.652
6181711	-0.0924	0.906
6182789	2.44	-0.0801
6182855	2.2	3.62
6187103	-0.0994	0.468
6187834	1.62	1.67
6190557	-0.308	0.0144
6192046	-0.52	-1.88
6192270	-0.0228	-1.15
6194750	1.03	1.17
6196768	-0.155	0.94
6197958	0.989	0.724
6198219	-0.506	0.836
6200632	1.36	0.678
6204880	-0.513	-0.356
6206423	-0.27	0.034
6207624	-0.416	-0.212
6207787	0.572	1.86
6209465	0.726	-1.38
6212041	0.887	-0.544
6212784	0.404	-4.18
6213588	2.92	-1.86
6216168	0.085	-0.665
6221758	1.45	1.93
6221877	1.61	6.13
6222042	0.19	2.76
6228266	-0.259	1.8
6230488	-0.27	-0.0489
6233274	-0.654	-2.12
6233809	-0.183	1.3
6234481	-0.865	-2.13
6237745	0.0259	0.403
6238765	-0.0785	0.294
6239187	-0.434	-0.36
6239487	0.134	-0.2
6240118	-0.251	-0.164
6242282	-0.641	-4.34
6261202	0.777	1.02
6263672	1.24	-0.189
6268084	1.18	-1.84
6275383	1.07	1.42
6289398	0.915	1.95
6292775	0.882	-0.141
6302522	0.582	1.25
6312417	0.242	1.27
6312705	-0.865	-1.66
6314949	1.08	1.5
6314954	0.0398	0.172
6318260	0.172	0.779
6322710	0.954	0.141
6329684	-0.482	-1.4
6332123	1.29	-0.359
6334513	0.363	-1.18
6335295	2.32	0.0437
6336115	0.869	-7.89
6343990	-0.11	-0.492
6356050	-0.086	-0.925
6360208	-0.0855	0.736
6374133	-0.0602	0.657
6377497	-0.315	0.705
6378779	-0.76	-0.935
6378798	0.189	1.21
6379652	0.19	1.91
6383741	-0.182	0.13
6389141	0.247	0.463
6390242	-0.419	-0.631
6391209	-0.388	-0.541
6398005	0.391	-0.54
6398464	2.23	0.313
6399232	1.03	-0.13
6402294	0.151	-0.0836
6404355	2.63	2.46
6408956	-0.548	-1.77
6409229	-0.677	-1.67
6411022	-0.506	-0.383
6411180	-0.473	0.063
6414553	0.182	0.735
6415423	-0.883	-0.063
6421146	-0.284	-0.637
6423680	0.384	1.56
6428491	0.551	-0.465
6428648	-0.643	-0.816
6428732	2.53	0.848
6428855	-0.249	1.29
6429121	-0.691	-1.03
6429282	-0.107	0.17
6429607	-1	1.66
6429693	0.92	0.834
6430090	-1.83	-0.0225
6430096	2.27	2.14
6430413	-0.741	-2.26
6430500	-1.79	-1.05
6430512	-0.785	-1.03
6431141	-0.44	2.68
6434026	-0.551	0.148
6435329	-0.685	-0.43
6435985	0.329	2.88
6440093	-1.78	-1.45
6441758	0.404	-1.29
6442116	-1.41	0.0225
6443462	0.374	4.72
6449121	0.471	4.13
6452355	0.172	0.61
6453542	-2.02	-2.92
6461736	-1.56	-0.343
6464189	1.68	-0.368
6466420	-1.28	-0.58
6471206	-0.52	1.5
6473561	-0.385	2.19
6482555	-1.23	-1.8
6487889	-0.305	0.343
6489585	-0.571	-2.6
6489767	-0.78	-2.21
6491998	-0.633	0.491
6493166	-0.487	-0.947
6494104	-0.277	0.328
6494212	-0.246	0.588
6496126	-0.14	-0.716
6498932	-1.16	-0.229
6499139	0.925	0.144
6499531	-0.252	-0.174
6500690	1	2.77
6501003	0.085	-1.17
6502106	2.22	1.17
6504732	0.0711	-3.01
6505523	-0.719	-1.92
6507285	-0.454	0.016
6509032	0.207	1.03
6510233	-0.371	-1.29
6510804	-0.117	-0.215
6511766	0.346	0.119
6514424	-0.0396	-0.082
6517613	0.318	-0.887
6518449	0.164	2.4
6520134	-0.827	-0.668
6520798	2.35	3.99
6521500	0.0224	0.0119
6521568	-0.321	-0.0726
6523002	-0.308	0.096
6523071	0.177	0.717
6529352	0.848	-0.426
6532464	-0.305	-0.0119
6532747	0.447	1.3
6533465	2.59	2.88
6534266	-0.145	-1.07
6535664	0.162	1.18
6537559	0.0154	-0.301
6537629	-0.221	-2.28
6540807	-0.068	1.47
6540986	-0.842	-0.503
6543487	0.795	0.167
6544202	1.99	0.412
6548707	1.18	1.44
6549658	1.34	3.01
6550429	-0.138	1.1
6552006	0.753	-0.0872
6554811	0.502	-1.33
6555614	-0.372	0.0123
6555795	0.53	-1
6563722	0.146	0.804
6563884	0.882	-0.0123
6565004	1.58	-1.99
6565106	0.673	-1.73
6566349	0.255	0.0454
6568269	-0.0715	-5.1
6569257	-0.381	-1.41
6569758	-0.269	-1.16
6574026	-0.517	-0.462
6574248	-0.353	-0.171
6576606	0.0714	0.552
6576728	-0.778	-0.846
6576946	-0.0628	-0.0254
6577261	0.309	0.0196
6578241	1.25	0.251
6578516	2.81	2.62
6578973	0.00847	0.594
6586291	0.771	2.34
6588976	-0.447	-0.743
6589457	0.236	1.08
6592300	0.454	2.22
6593312	-0.362	-0.00327
6593689	0.0275	0.00327
6595017	0.708	0.486
6595070	1.43	-2.37
6596778	-0.113	-0.211
6599114	-1.7	-1.74
6599288	-1.32	0.574
6600433	-1.24	-0.354
6601747	-0.652	1.19
6601963	-1.09	-0.0144
6602313	-0.475	0.814
6603202	0.151	1.97
6606973	0.405	0.762
6607823	-0.997	-0.167
6607894	-0.927	1.12
6607967	-0.628	0.941
6610271	-0.92	-0.44
6610750	-0.0602	-0.339
6611403	-1.13	-0.894
6612483	0.457	3.16
6612709	-0.086	-2.31
6614516	1.96	0.0107
6614580	0.339	1.85
6615363	1.51	1.26
6615430	2.11	-1.27
6616780	0.13	-0.594
6617447	-0.225	1.94
6617661	0.729	1.24
6617978	-1.26	-0.43
6618030	-0.649	0.426
6618080	-0.252	1.32
6621081	0.257	0.297
6621305	-0.184	0.0143
6622985	0.149	-0.267
6624882	-0.381	1.13
6625043	-0.103	0.858
6625972	0.115	-0.334
6628142	0.533	-0.0536
6629973	1.36	-0.411
6631583	0.203	0.957
6632381	2.4	-0.678
6634051	1.34	1.11
6634294	1.09	1.33
6634301	-1	-2.11
6634438	-2.22	-3.52
6634770	0.265	-0.914
6634779	-1.6	-0.0798
6634987	-1.37	-1.03
6635280	0.636	-0.999
6635826	0.809	-0.0188
6636350	-1.19	-0.262
6636496	1.47	1.48
6636661	2.15	0.376
6636770	2.56	-3.05
6636821	-1.43	-1.24
6636870	-2.18	-3.46
6637042	0.0996	2.23
6638117	-1.72	-1.26
6638880	-1.86	0.00327
6640097	1.75	2.71
6641263	1.32	0.0951
6641389	1.1	2.24
6641572	0.139	0.0353
6642577	-1.47	-0.00327
6642765	0.312	-1.13
6644487	-1.63	-0.712
6646138	0.549	-0.147
6647808	-1.34	-1.07
6650288	0.492	3.66
6653239	1.19	1.67
6653306	0.439	-0.202
6653867	-0.956	0.586
6655102	0.362	-2.94
6659707	-1.93	-2.93
6659736	1.72	-3.49
6660137	-2.12	-1.94
6660754	-1.34	0.0583
6661729	1.19	0.171
6663433	-0.754	3.15
6663827	-1.08	-0.357
6666616	-0.524	-1.79
6667177	-0.171	-0.282
6667747	0.882	-0.484
6667931	-1.51	-1
6671512	-1.86	-1.36
6676580	-0.943	5.26
6677686	-1.41	0.934
6678018	0.0154	1.05
6680774	-0.802	-2.83
6686285	-0.266	-1.47
6687109	-1.75	-0.718
6688112	-1.68	-2.19
6689770	2.03	3.02
6695665	0.132	-0.653
6696535	0.0958	-0.0402
6700208	0.399	0.0402
6701652	-0.532	-0.913
6706806	1.34	3.06
6707934	-0.394	-2.6
6708584	0.752	0.715
6708847	0.336	-1.51
6710103	0.222	-4.39
6712519	-0.917	-0.333
6713122	1.61	0.39
6713200	0.272	-1.25
6713704	0.662	0.887
6718849	0.895	0.717
6722462	0.259	-1.37
6723170	1.1	0.879
6723678	0.162	-3.23
6730688	0.595	-4.16
6734399	-1.48	-1.84
6734741	-1.22	0.167
6736598	-1.88	-1.29
6741686	-2.11	-3.22
6746997	-1.3	-0.36
6750815	-1.27	-0.293
6751472	-0.256	0.49
6751622	1.96	2.56
6751942	-1.15	-0.0602
6753241	-1.37	0.796
6754491	-1.2	-0.337
6755895	2.69	3.49
6757099	1.05	0.766
6757461	-1.42	-1.36
6761431	0.455	-0.613
6764376	1.14	0.851
6772324	0.659	-0.696
6774417	0.905	-0.596
6777813	1.74	1.66
6778429	-1.09	-1.54
6778801	0.528	2.15
6780114	2.04	4.28
6786301	0.848	-4.01
6787105	-1.29	-2.57
6787493	-0.865	1.04
6790835	-0.28	1.65
6791110	-1.7	-0.276
6791179	-1.61	-0.802
6791723	-1.94	-0.403
6793867	-1.28	-1.08
6796668	-0.887	2.36
6796884	-1.59	0.0507
6797313	-1.08	0.028
6798732	-0.877	1.81
6799517	-0.63	1.96
6800373	-0.127	1.28
6801015	-1.28	-1.62
6801465	-0.565	1.87
6801556	-1.32	-3
6802163	-1.41	-0.184
6803996	-1.06	-0.182
6804797	-1.13	-0.254
6806043	-1.35	-0.993
6806316	-0.214	0.182
6807104	1.03	-0.943
6809960	0.2	0.148
6810109	0.216	-0.656
6811643	-0.397	0.289
6811977	-0.887	-0.72
6812031	-0.27	0.481
6812455	-0.89	-1.54
6813583	1.26	-0.028
6815235	-0.463	-0.606
6816730	-0.00743	0.835
6818635	0.0492	0.303
6820880	0.239	-1.5
6822250	0.492	0.23
6822989	-0.507	-0.208
6827633	-0.807	-0.537
6829885	-0.889	-1.32
6830307	-1.2	-0.931
6833821	-0.57	-0.695
6834317	-0.0374	1.41
6834736	-0.793	-2.08
6835066	0.312	1.14
6835346	-0.496	0.66
6838343	1.23	1.94
6841307	-0.284	1.3
6841335	-0.527	0.606
6842852	0.308	0.667
6843285	-0.597	-1.59
6847680	0.123	-2.48
6849818	1.35	2.91
6851274	1.9	3.84
6852169	-1.89	-1.31
6852616	1.45	-1.3
6852695	-0.0468	-0.271
6853009	0.229	3.76
6853333	-1.83	-3.34
6853887	-0.79	3.37
6860484	-0.394	3.78
6860658	-1.11	-0.68
6863268	-1.89	-1.38
6864439	-1.28	0.033
6867301	-0.365	2.81
6869204	-0.823	0.92
6869349	-0.49	-0.365
6869490	-0.68	0.271
6870218	-0.0354	1
6871035	0.285	0.349
6872031	-0.56	0.0198
6872366	-1.41	0.13
6872903	-2.03	-1.34
6872970	-1.78	-1.45
6873499	-0.0496	0.916
6874621	-0.751	0.483
6874781	-1.43	-0.0198
6876352	-1.55	-0.865
6876376	-1.21	0.0654
6876792	-1.31	-0.373
6876913	-1.3	-0.287
6877128	-1.15	-0.669
6877701	-0.419	0.454
6877755	1.03	4.93
6878039	-0.074	3.32
6879291	1.38	3.39
6881251	-0.562	-0.644
6881687	-0.686	0.144
6882438	1.83	-1.94
6882600	-0.222	0.0176
6882913	1.91	1.18
6884352	-0.41	-0.52
6884516	-0.364	-0.0176
6884778	0.754	1.53
6885901	1.42	-1.53
6887065	0.666	0.725
6888872	-0.222	0.474
6889953	-0.24	1.64
6889966	1.31	0.744
6891034	-0.13	0.247
6894811	1.13	-0.686
6895733	-1.21	-3.47
6897043	0.995	-1.22
6897501	-0.353	-0.0794
6900924	-0.0455	-1.44
6902793	0.967	-3.24
6904819	1.8	1.1
6907784	1.48	-0.111
6908094	-0.291	-2.1
6913002	0.384	1.19
6913483	0.349	-0.0974
6914634	0.151	-1.17
6914677	0.645	0.702
6916512	2	0.0784
6916572	0.356	-1.45
6916605	1.11	0.134
6920232	-0.899	-2.11
6928526	-0.555	0.174
6929825	0.623	-8.35
6930604	-0.0715	2.5
6935928	-0.59	-0.373
6940983	-0.343	0.614
6941581	1.13	0.376
6942909	0.2	2.39
6943458	0.781	1.74
6943488	1.52	-1.05
6943568	-0.569	-1.51
6943632	1.27	2.57
6943898	-0.44	0.0635
6944932	-0.454	0.746
6945149	-0.252	0.253
6945948	-0.0124	1.22
6946076	0.224	1.99
6946209	0.513	0.667
6946672	0.398	-0.016
6948046	0.716	-0.269
6948081	0.536	-1.08
6948407	1.36	1.25
6948815	1.81	-0.989
6949954	1.87	-0.394
6950235	2.23	-4.44
6951669	-0.166	-2.57
6951737	-0.141	0.0201
6953122	-0.68	-0.616
6953541	-0.626	-1.9
6953618	-0.677	0.124
6954384	-1.4	-3.16
6954776	-0.604	-0.795
6954937	-0.58	-0.0237
6955702	-0.475	-0.199
6956765	-0.618	-0.685
6957255	-1.77	-5.38
6957513	0.562	0.639
6957546	-0.274	0.37
6959309	1.01	4.01
6961730	0.623	0.136
6961786	3.22	4.2
6961898	1.24	2.88
6964265	-1.4	-7.13
6964506	0.436	1.36
6964532	-0.715	-1.72
6965779	0.0746	-0.268
6966127	0.134	0.0974
6966962	0.28	0.567
6967229	-1.78	-6.09
6967597	-0.649	-1.58
6968035	-0.816	0.593
6969269	-1.23	-1.91
6970664	-0.12	-1
6970684	0.422	0.376
6971406	0.843	2
6971466	-0.331	2.27
6971627	-0.589	-0.00203
6972600	0.0639	0.771
6972974	0.624	0.0836
6974185	0.283	-1.96
6974909	1.47	0.427
6975271	-0.0959	-1.04
6977040	-0.746	-2.14
6979788	-0.433	-3.62
6981785	-0.0785	-1.1
6982403	0.186	-0.637
6982421	0.89	-0.103
6984149	0.51	0.93
6984280	0.0213	0.995
6984687	0.742	1.44
6984688	0.579	-0.296
6985014	0.294	-2.15
6985352	0.443	-1.67
6985547	0.603	3.03
6985867	0.0293	0.672
6986007	0.0923	0.782
6987106	0.234	0.335
6987982	-0.812	-1.05
6989193	-0.0298	0.365
6990686	0.175	0.629
6992491	-0.0924	-0.0201
6993306	0.0293	-0.814
6995179	2.12	5.19
6996644	0.979	-1.06
6997050	-0.0368	-0.708
6998267	-0.193	-0.168
6998501	0.603	-0.189
6998789	0.989	-0.547
6999379	0.827	-0.00344
6999535	0.659	1.48
6999845	0.332	-0.0149
7000299	0.269	0.0149
7001832	-0.175	-1.81
7001847	0.857	0.763
7001912	-0.549	-1.23
7002973	0.339	2.21
7003497	0.725	-0.587
7003557	-0.0553	0.493
7004055	0.0128	-0.292
7004207	0.226	-1.53
7005269	0.734	-1.33
7005488	-0.399	-1.27
7005706	-0.532	0.533
7006421	-1.19	-1.22
7007023	0.246	3.47
7007041	-0.961	-1.5
7007187	0.24	3.1
7007420	0.211	0.0237
7007890	0.283	-2.81
7008010	1.69	0.224
7008416	0.487	0.601
7008836	-1.15	-4.1
7008837	0.589	1.91
7008870	-0.64	0.519
7009066	-0.433	0.84
7010323	-0.64	-0.0182
7011120	-0.472	-0.543
7011169	0.0838	2.19
7011570	-0.0582	-0.665
7011836	0.0242	-2.41
7011916	-0.484	-4.98
7012036	-0.339	-1.55
7012439	-0.842	-1.55
7012626	0.85	2.66
7012895	-0.0156	1.6
7013109	-0.245	0.636
7013188	-0.501	-1.63
7013251	0.595	1.17
7013646	1.47	3.05
7014090	1.03	2.33
7014597	-0.0695	0.0663
7015096	0.489	1.05
7015332	-0.192	1.8
7015459	0.815	2.37
7016136	0.367	-0.313
7016214	-0.179	-3.03
7016253	-0.464	-0.0663
7016257	0.41	4.02
7016643	-0.538	-1.41
7017505	0.532	1.27
7017638	-1.33	-2.27
7018018	-1.55	-0.156
7018124	-2.63	-2.78
7018666	1.24	2.39
7018752	1.88	4.91
7019069	-1.44	-0.319
7020095	0.572	1.71
7020277	-2.47	-3.86
7020785	-1.27	0.787
7021054	-0.0269	1.27
7021246	-0.608	0.684
7021891	-0.172	-0.0152
7021940	1.02	1.1
7021974	-1.87	-8.93	CB3	Bscore
7022019	-0.311	-0.562
7024304	0.18	0.586
7027616	-0.59	-1
7031226	0.158	-1.73
7031957	-0.273	1.1
7033932	1	0.0152
7034767	-0.412	-0.525
7037920	0.308	1.44
7038033	1.72	2.95
7040741	0.519	-0.433
7042104	0.545	0.832
7043092	0.0791	0.76
7045540	1.18	2.1
7045775	0.196	-0.913
7046323	1	0.303
7047636	0.928	-1.44
7050536	2.48	-0.303
7050993	1.42	1.13
7057612	0.782	-0.251
7060011	-0.726	-1.87
7064660	0.595	0.251
7065434	0.945	0.483
7066268	0.382	-1
7066385	1.29	0.58
7070160	1.09	-1.61
7076229	2.29	-1.74
7077185	0.825	-2.01
7080870	-0.489	1.29
7082497	0.669	0.533
7084381	-0.113	-0.879
7084505	-0.79	-2.22
7094482	-0.723	-1.77
7097615	0.139	-0.909
7098546	-0.532	-2.64
7099084	-0.226	-3.26
7100167	0.043	-1.9
7101344	1.19	1.54
7101634	2.04	0.319
7101636	0.329	2.16
7102221	-0.514	-0.668
7102439	1.89	4.7
7102564	-0.654	0.58
7102876	-1.04	-3.35
7103100	-0.318	0.415
7103247	2.41	4.74
7103619	0.211	1.26
7103769	1.71	3.96
7103907	-0.327	-0.187
7105277	0.221	-3.24
7105757	1.95	-0.0207
7109829	0.528	3.15
7110903	0.0765	2.31
7111602	0.609	3.91
7111771	-0.223	2.75
7112672	-0.294	-0.329
7113059	-0.983	-2.6
7113261	-0.171	-0.476
7113390	0.0958	-0.257
7113757	0.19	2.87
7113843	-0.561	-0.837
7114040	-0.000895	0.164
7115674	0.342	-2.64
7115828	1.64	-1.6
7116331	1.5	2.29
7116510	1.94	3.63
7116868	1.77	2.81
7117224	0.402	-0.671
7117965	-0.169	-0.981
7118319	0.202	0.552
7118372	-0.154	0.0198
7118426	0.635	1.84
7119440	0.309	0.867
7120254	1.45	2.07
7120444	0.787	-0.182
7121470	0.289	0.0123
7122710	-0.221	-2.55
7123371	0.393	-0.277
7123602	0.768	-1.48
7123653	2.16	1.82
7123904	1.02	0.884
7124405	0.888	1.14
7124783	0.87	0.0431
7124919	0.845	-0.0212
7125586	0.798	0.00596
7125998	0.88	0.293
7127463	0.585	-1.54
7128543	0.77	0.164
7128735	0.469	-2.83
7130005	1.94	-4.21
7130163	2.52	3.4
7130769	1.8	2.92
7132522	1.36	0.485
7132949	1.93	1.91
7134586	0.435	-2.81
7135217	1.92	0.0294
7135228	0.68	-1.36
7135413	0.952	-0.485
7135680	0.05	-0.521
7136250	0.712	-1.94
7137069	0.836	3.68
7139507	0.592	-3.5
7141751	-0.325	-1.4
7143070	0.584	0.805
7144533	0.213	-0.124
7144619	1.38	4.05
7144639	-0.00304	-2.72
7145035	1.65	-2.04
7145527	0.446	-1.6
7145762	0.216	0.678
7147784	-0.29	0.255
7148201	-0.196	-0.595
7150600	0.103	0.732
7152073	0.241	0.179
7153527	0.11	0.111
7154335	-0.0243	-0.378
7155893	0.068	0.45
7159030	0.227	-1.3
7159673	-0.518	-0.329
7159867	0.599	0.0162
7159875	0.297	1.2
7162106	0.392	0.19
7162965	0.272	0.931
7165865	0.492	0.697
7167378	0.216	0.236
7168976	0.768	0.533
7170418	0.892	-0.499
7171100	-0.134	-0.125
7173063	-0.138	0.125
7173107	2	-0.919
7178127	0.503	0.489
7178970	0.715	0.457
7179770	0.605	0.977
7180969	0.0758	0.251
7181211	1.73	-1.77
7181351	-0.0965	-1.58
7184520	-0.0143	-1.19
7184729	-0.224	-1.84
7185724	0.336	0.689
7186323	1.01	3.79
7188831	0.308	-0.107
7189190	0.308	0.107
7194100	0.52	1.13
7195256	1	1.39
7197469	0.784	0.147
7197975	0.725	-1.07
7200458	1.91	-1.24
7200510	0.857	2.02
7204283	-0.513	-1.36
7204884	-0.0228	0.987
7205301	1.55	5.03
7205611	0.0676	0.296
7205785	2.85	0.874
7207707	0.475	1.63
7208433	0.537	-0.741
7211901	2.47	0.4
7212039	-0.487	0.0383
7213087	-1.4	-0.982
7214664	-0.46	0.241
7220745	-2.23	-2.56
7220864	-2.47	-2.64
7221428	-1.89	-1.89
7222198	-0.952	1.4
7222345	-0.758	0.488
7222370	-0.635	2.43
7222490	-0.141	1.49
7223357	1.22	0.732
7223656	-1.14	0.0144
7223725	-2.18	-2.27
7223912	-1.99	-0.918
7223962	-0.624	-0.413
7224114	-1.96	-1.99
7224412	0.0758	1.38
7224923	-1.89	-1.6
7225130	-1.23	0.586
7225641	-0.179	1.49
7226755	0.0606	-2.73
7228973	2.04	-1.42
7229532	-0.562	0.02
7229598	1.69	2.43
7230361	-0.807	1.79
7231311	-0.986	0.143
7231397	0.219	3.07
7231779	-0.5	2.08
7232703	-0.817	0.162
7233103	-0.48	-1.34
7233586	0.495	4.13
7233804	1.57	-0.678
7233950	1.74	6.12
7235845	-0.617	-1.58
7236054	-0.305	-0.465
7236538	0.252	2.45
7236715	-0.7	0.208
7236979	-0.637	-0.587
7236999	-0.78	-0.571
7237123	-0.584	-1.55
7237532	1.1	3
7237768	1.8	1.1
7237845	-0.555	-1.25
7238276	-0.377	-1.55
7238741	0.609	2.9
7239067	-0.783	-0.918
7239431	-0.277	-0.126
7240253	0.0991	1.75
7242219	0.116	0.126
7243291	0.775	1.01
7243965	1.57	-0.538
7244122	0.392	0.0637
7244308	0.156	0.13
7244548	0.532	2.65
7244679	0.252	0.626
7244978	0.422	1.76
7245471	0.0891	-1.11
7245717	0.216	-2.13
7246421	1.34	-2.51
7246702	-0.174	-0.0401
7247002	-0.583	-0.0401
7247323	-0.247	0.611
7247516	-0.733	0.0401
7248113	0.655	3.99
7248289	-0.0348	0.536
7248299	-0.415	-0.605
7249069	0.0782	1.41
7249499	-0.667	-0.214
7250455	0.392	1.9
7250514	0.718	1.59
7251727	1.97	1.67
7251948	0.852	2.25
7252179	-0.737	-1.9
7252279	0.0325	1.77
7252749	2.37	1.04
7253559	-0.803	-0.0511
7253564	0.269	2.77
7253735	0.0125	2.38
7253846	-1.07	-3.19
7254477	0.855	2.24
7254550	0.256	0.833
7255156	1.9	1.59
7255297	-0.207	-0.00783
7255412	-0.0451	-0.137
7255762	-0.795	-1.5
7256143	-1.85	-4.96
7256169	1.03	3.64
7256719	-0.936	-0.536
7257071	-0.0441	1.64
7258790	-0.96	-1.11
7258803	-0.177	0.00783
7259615	0.236	0.0138
7259935	1.91	1.6
7259959	-0.111	-0.0876
7260995	-0.254	2.54
7261907	-0.993	0.636
7261929	-1.04	-0.524
7262165	-0.63	1.13
7262271	0.164	0.754
7263536	-0.946	-0.791
7264699	-0.597	-0.274
7265974	0.635	1.66
7266056	1.2	3.12
7266179	-0.284	0.955
7266360	-0.48	0.995
7266374	-0.054	1.52
7266404	-0.104	1.53
7266944	-0.404	-0.324
7267814	-0.084	0.0861
7268899	0.629	0.161
7269305	0.372	-0.623
7270194	-0.414	-0.297
7270785	-0.197	1.22
7271111	-0.623	-1.31
7271264	-0.64	-1.17
7273637	-0.0828	0.137
7274349	-0.117	-0.0857
7275004	0.136	0.0857
7275454	1.39	2.12
7275756	0.231	-2.47
7275811	-0.513	-2.04
7276007	-0.955	-2.23
7276284	-0.145	-0.258
7277514	0.188	-0.114
7278978	0.114	0.0218
7280948	0.804	2.49
7281389	0.57	-0.17
7283366	-0.969	-4.55
7283368	-0.647	-0.3
7283697	-0.778	0.621
7284363	0.27	-0.525
7284755	-0.12	2.05
7284841	-0.474	-0.267
7285604	0.461	3.48
7285894	-0.435	0.267
7287252	-0.184	-0.652
7287916	0.269	-1.52
7288812	2.65	1.34
7288822	0.213	1.38
7290040	-1.1	-1.95
7291044	-0.973	-2.41
7291734	-0.3	-1.05
7292106	-0.176	-0.206
7292231	0.794	3.27
7294828	-0.0597	0.206
7295456	1.69	4.65
7296136	1.63	1.12
7296488	0.454	0.0261
7297257	-0.265	-1.16
7297728	0.372	0.194
7297786	-0.153	2.29
7298082	0.563	-0.169
7298446	0.666	0.6
7298864	-1.09	-1.17
7300055	0.238	-0.941
7300219	0.22	-2.82
7300333	0.687	-1.51
7300398	-0.0384	-1
7301469	-0.403	-0.92
7301808	0.563	1.61
7302038	-0.0241	2.35
7302684	0.0182	-1.39
7302698	0.4	0.381
7303565	0.471	0.627
7303779	0.698	-0.381
7304787	-0.189	2.16
7305204	1.76	0.989
7305284	0.673	0.185
7305482	0.153	-0.289
7306026	0.308	-0.661
7306728	0.882	0.344
7308340	0.102	2.9
7310254	-0.269	-1.18
7310598	0.627	-0.167
7311548	0.337	-1.21
7313338	1.11	-0.269
7316918	1.16	0.691
7318943	1.01	2.98
7319187	-0.757	-2.15
7319591	-0.274	1.61
7319635	-0.455	-1.22
7319842	-0.517	-0.889
7321470	-0.0422	0.786
7323869	0.208	-0.146
7325351	1.33	0.146
7325587	1.21	4.13
7326102	-0.354	0.0207
7326113	-0.262	1.81
7326305	-0.344	-0.529
7326721	-0.661	-1.49
7327525	-0.323	-0.509
7328964	0.0533	-0.8
7332455	1.45	0.893
7333715	-0.654	-0.378
7333939	-1.33	0.0158
7335161	-1.59	-0.00307
7335309	-1.21	0.00307
7337863	-1.27	0.39
7339148	-1.3	-0.527
7339557	-0.512	1.28
7339987	0.353	0.273
7341242	-0.236	0.628
7342260	-1.16	-0.235
7342354	-1.36	0.0602
7345904	-0.77	1.14
7346038	-1.44	-1.59
7349760	-1.13	-0.752
7351347	0.0739	3.13
7351963	1.84	6.69
7352879	-0.000895	1.48
7353104	-0.22	4.19
[truncated: 28,001 more rows]

## Sheet: List Key
Group	Description
Bscore	On Bscore list only
Bscore (+)	On Bscore list only, also met 2SD threshold despite not being on that list
StDev	On StDev list only
StDev (+)	On StDev list only, also met B score threshold despite not being on that list
StDev and Bscore	On both Bscore and StDev lists
StDev*	On StDev list only, did not meet 2SD threshold despite being on that list
StDev* and Bscore	On both Bscore and StDev lists, did not meet 2SD threshold despite being on that list
