# Supplementary material for: A Screen for Small Molecules to Target Candida albicans Biofilms
Source: J Fungi (Basel). 2020 Dec 27;7(1):9. doi: 10.3390/jof7010009 (PMC7824004; doi:10.3390/jof7010009)
Supplement: Supplementary file 1 [file jof-07-00009-s001.zip › File S2 - Candidate Compound List 102820.xlsx]

## Sheet: File S2
Candidate Number	Chembridge Catalog Number	Positive Controls	Δ Standard Deviations	B-Score	List
CB1	5172395		-3.32	-7.16	Bscore (+)
CB2	6109266		-2.15	-8.58	Bscore (+)
CB3	7021974		-1.87	-8.93	Bscore
CB4	9017513		-2.71	-6.72	Bscore (+)
CB5	65473205		-2.44	-4.37	StDev (+)
CB6	22164746		-2.24	-5.02	Bscore (+)
CB7	44346722		-2.32	-3.65	StDev
CB8	24010136		-2.51	-6.36	Bscore (+)
CB9	21839975		-2.54	-3.59	StDev
CB10	76835526		-6.46	-18.5	StDev and Bscore
CB11	47213814		-1.8	-6.52	Bscore
PC12	17159859	PC12	N/A	N/A	Positive Control
CB13	90921149		-2.75	-4.45	StDev (+)
CB14	10068182		-1.95	-10.1	StDev* and Bscore
CB15	29709313		-3.47	-9.79	StDev and Bscore
CB16	83369916		-3.19	-8.94	StDev and Bscore
CB17	80338143		-2.2	-7.11	Bscore (+)
CB18	96396680		-2.82	-7.47	Bscore (+)
CB19	94026415		-3.52	-9.35	StDev and Bscore
CB20	85887252		-1.99	-3.8	StDev*
CB21	93871780		-3.18	-7.71	StDev and Bscore
CB22	62622430		-2.53	-9.67	StDev and Bscore
CB23	89031457		-2.76	-7.18	StDev and Bscore
CB24	46142202		-2.03	-4.59	Bscore (+)
CB25	98367045		-2.71	-7.43	Bscore (+)
PC26	80527891	PC26	N/A	N/A	Positive Control
PC27	61894700	PC27	N/A	N/A	Positive Control
CB28	18579175		-2.19	-8.63	Bscore (+)
CB29	80088177		-2.11	-6.5	Bscore (+)
CB30	16014022		-1.14	-8.12	Bscore
CB31	36491778		-2.45	-4.26	StDev (+)
CB32	49850402		-3.05	-6.96	StDev and Bscore
CB33	13180726		-2.2	-7.54	StDev and Bscore
CB34	13389779		-2.31	-5.95	Bscore (+)
CB35	26812718		-2.35	-2.17	StDev
CB36	29059737		-2.22	-7.7	StDev and Bscore
CB37	29518018		-4.06	-13.3	StDev and Bscore
CB38	31155537		-3.09	-6.08	StDev and Bscore
CB39	33408360		-3.31	-9.58	StDev and Bscore
CB40	35558198		-2.38	-7.47	StDev and Bscore
CB41	39278502		-3.5	-6.4	StDev and Bscore
CB42	39825733		-2.59	-6.65	Bscore (+)
CB43	54657095		-1.65	-7.01	Bscore
CB44	61027677		-2.94	-8.04	StDev and Bscore
CB45	61856154		-2.43	-3.24	StDev
CB46	69219247		-2.3	-2.29	StDev
CB47	74212169		-3.64	-15.9	StDev and Bscore
CB48	86794777		-3.72	-10.9	StDev and Bscore

## Sheet: List Key
Group	Description
Bscore	On Bscore list only
Bscore (+)	On Bscore list only, also met 2SD threshold despite not being on that list
Positive Control	Positive Control compound that was a hit in the 2015 Pierce screen of Chembridge NOVACore library, not present in the library we screened
StDev	On StDev list only
StDev (+)	On StDev list only, also met Bscore threshold despite not being on that list
StDev and Bscore	On both Bscore and StDev lists
StDev*	On StDev list only, did not meet 2SD threshold despite being on that list
StDev* and Bscore	On both Bscore and StDev lists, did not meet 2SD threshold despite being on that list
