# Supplementary material for: A Screen for Small Molecules to Target Candida albicans Biofilms
Source: J Fungi (Basel). 2020 Dec 27;7(1):9. doi: 10.3390/jof7010009 (PMC7824004; doi:10.3390/jof7010009)
Supplement: Supplementary file 1 [file jof-07-00009-s001.zip › File S3 - Compiled Data 102820.xlsx]

## Sheet: Stand-alone Inhibition
Compound	Compound Concentration	Average OD600	Control Average OD600	Experimental OD600 < Control OD600?	Bonferroni Correction Pass (α=0.05)?	Welch’s t-test
CB01	40uM	0.201437	0.203168	YES		0.386048
CB01	40uM	0.205363	0.197522			0.096684
CB02	40uM	0.192625	0.197522	YES		0.00386471
CB02	40uM	0.197037	0.203168	YES		0.0874796
CB03	40uM	0.203113	0.203168	YES		0.591673
CB03	40uM	0.200775	0.197522			0.709784
CB04	40uM	0.2058	0.203168			0.944975
CB04	40uM	0.200675	0.197522			0.637028
CB05	40uM	0.1869	0.203168	YES		0.00388864
CB05	40uM	0.198875	0.20078	YES		0.424746
CB05	40uM	0.19145	0.197522	YES		0.0603655
CB05	40uM	0.2087	0.20126			0.120605
CB06	40uM	0.199762	0.203168	YES		0.172304
CB06	40uM	0.193525	0.197522	YES		0.108813
CB07	40uM	0.202512	0.203168	YES		0.536916
CB07	40uM	0.201412	0.197522			0.359136
CB08	40uM	0.197462	0.197522	YES		0.414794
CB08	40uM	0.20025	0.203168	YES		0.258267
CB09	40uM	0.20135	0.203168	YES		0.327938
CB09	40uM	0.1971	0.20126	YES		0.192284
CB09	40uM	0.20285	0.197522			0.226368
CB09	40uM	0.20925	0.20078			0.0809529
CB10	40uM	0.192987	0.203168	YES		0.0431019
CB10	40uM	0.200775	0.197522			0.615552
CB11	40uM	0.191213	0.197522	YES		0.048779
CB11	40uM	0.210663	0.203168			0.338379
CB13	40uM	0.191363	0.203168	YES		0.0442176
CB13	40uM	0.201275	0.197522			0.643033
CB14	40uM	0.202675	0.197522			0.315882
CB14	40uM	0.2157	0.203168			0.0301919
CB15	40uM	0.204625	0.203168			0.908985
CB15	40uM	0.203975	0.197522			0.0699315
CB16	40uM	0.211112	0.197522			0.00340045
CB16	40uM	0.205213	0.203168			0.95194
CB17	40uM	0.197688	0.197522			0.595185
CB17	40uM	0.208612	0.203168			0.407776
CB18	40uM	0.191763	0.203168	YES		0.0105774
CB18	40uM	0.190538	0.197522	YES		0.00108949
CB18	40uM	0.197225	0.20126	YES		0.0463914
CB18	40uM	0.215263	0.20078			0.00360476
CB19	40uM	0.201638	0.203168	YES		0.39966
CB19	40uM	0.195375	0.20126	YES		0.0854709
CB19	40uM	0.204525	0.20078			0.397872
CB19	40uM	0.201763	0.197522			0.275191
CB20	40uM	0.1974	0.197522	YES		0.674523
CB20	40uM	0.197612	0.20126	YES		0.426555
CB20	40uM	0.1902	0.20078	YES		0.0450873
CB20	40uM	0.206012	0.203168			0.918753
CB21	40uM	0.199912	0.203168	YES		0.330923
CB21	40uM	0.200988	0.197522			0.563259
CB22	40uM	0.200888	0.203168	YES		0.263676
CB22	40uM	0.200975	0.197522			0.534263
CB23	40uM	0.200063	0.20078	YES		0.725742
CB23	40uM	0.212637	0.20126			0.000472672
CB23	40uM	0.206375	0.203168			0.869115
CB23	40uM	0.198213	0.197522			0.772887
CB24	40uM	0.202025	0.203168	YES		0.36896
CB24	40uM	0.1961	0.197522	YES		0.225321
CB25	40uM	0.2046	0.197522			0.0852729
CB25	40uM	0.215712	0.203168			0.0229791
CB28	40uM	0.19295	0.203168	YES		0.020143
CB28	40uM	0.202125	0.20078			0.896197
CB28	40uM	0.201937	0.20126			0.872233
CB28	40uM	0.19815	0.197522			0.669395
CB29	40uM	0.211413	0.203168			0.121368
CB29	40uM	0.204762	0.197522			0.0766351
CB30	40uM	0.202175	0.197522			0.445527
CB30	40uM	0.2172	0.203168			0.0428388
CB31	40uM	0.194288	0.20078	YES		0.123241
CB31	40uM	0.205025	0.203168			0.915135
CB31	40uM	0.201288	0.20126			0.724981
CB31	40uM	0.201763	0.197522			0.339904
CB32	40uM	0.178912	0.197522	YES	YES	0.000321868
CB32	40uM	0.190862	0.20126	YES		0.00383672
CB32	40uM	0.20805	0.203168			0.591064
CB32	40uM	0.20415	0.20078			0.498496
CB33	40uM	0.199438	0.20078	YES		0.654207
CB33	40uM	0.200537	0.20126	YES		0.529051
CB33	40uM	0.195125	0.20126	YES		0.0932781
CB33	40uM	0.20585	0.20078			0.439791
CB34	40uM	0.199025	0.20078	YES		0.511094
CB34	40uM	0.198487	0.20126	YES		0.337074
CB34	40uM	0.192738	0.20078	YES		0.150139
CB34	40uM	0.20995	0.20126			0.189468
CB35	40uM	0.188975	0.20078	YES		0.0104384
CB35	40uM	0.198862	0.20126	YES		0.289592
CB35	40uM	0.196525	0.20126	YES		0.0994782
CB35	40uM	0.208438	0.20078			0.138645
CB36	40uM	0.1801	0.20126	YES	YES	0.000265806
CB36	40uM	0.192938	0.20078	YES		0.0045012
CB36	40uM	0.184338	0.20126	YES		0.0011633
CB36	40uM	0.199513	0.20078	YES		0.588412
CB37	40uM	0.182463	0.20126	YES	YES	1.13695e-07
CB37	40uM	0.1927	0.20078	YES		0.0513844
CB37	40uM	0.20145	0.20078			0.985517
CB37	40uM	0.212387	0.20126			0.0767093
CB38	40uM	0.196737	0.20078	YES		0.481489
CB38	40uM	0.224412	0.20126			0.00818739
CB38	40uM	0.212725	0.20126			0.000587939
CB38	40uM	0.206075	0.20078			0.0934554
CB39	40uM	0.197725	0.20126	YES		0.26277
CB39	40uM	0.21325	0.20078			0.0087751
CB39	40uM	0.213875	0.20078			0.0207101
CB39	40uM	0.2121	0.20126			0.0134315
CB40	40uM	0.182812	0.20078	YES	YES	1.99361e-05
CB40	40uM	0.183125	0.20126	YES		0.000518224
CB40	40uM	0.1972	0.20078	YES		0.218836
CB40	40uM	0.203337	0.20126			0.775664
CB41	40uM	0.2005	0.20078	YES		0.79725
CB41	40uM	0.2111	0.20126			0.00959979
CB41	40uM	0.222988	0.20078			0.00192448
CB41	40uM	0.205238	0.20126			0.395872
CB42	40uM	0.187138	0.20126	YES		0.0036617
CB42	40uM	0.194713	0.20126	YES		0.196829
CB42	40uM	0.20565	0.20078			0.408274
CB42	40uM	0.2105	0.20078			0.165835
CB43	40uM	0.19945	0.20078	YES		0.581473
CB43	40uM	0.1943	0.20078	YES		0.230513
CB43	40uM	0.1958	0.20126	YES		0.101435
CB43	40uM	0.203875	0.20126			0.680908
CB44	40uM	0.196587	0.20126	YES		0.00169769
CB44	40uM	0.187687	0.20126	YES		0.00125316
CB44	40uM	0.199462	0.20078	YES		0.479018
CB44	40uM	0.203712	0.20078			0.521412
CB45	40uM	0.198	0.20126	YES		0.1307
CB45	40uM	0.201288	0.20078			0.948006
CB45	40uM	0.212438	0.20126			0.106073
CB45	40uM	0.208825	0.20078			0.0834318
CB46	40uM	0.19865	0.20078	YES		0.59018
CB46	40uM	0.20125	0.20078			0.929107
CB46	40uM	0.206863	0.20126			0.363538
CB46	40uM	0.210838	0.20126			0.0820126
CB47	40uM	0.191938	0.20126	YES		0.00760021
CB47	40uM	0.2052	0.20126			0.536792
CB47	40uM	0.20395	0.20078			0.473946
CB47	40uM	0.207388	0.20078			0.180136
CB48	40uM	0.186375	0.20078	YES		0.00432534
CB48	40uM	0.184963	0.20078	YES		0.0197586
CB48	40uM	0.206388	0.20126			0.345266
CB48	40uM	0.206988	0.20126			0.196698
PC12	40uM	0.174938	0.197522	YES	YES	6.56135e-05
PC12	40uM	0.17735	0.203168	YES	YES	2.74998e-10
PC26	40uM	0.180875	0.197522	YES	YES	9.57046e-07
PC26	40uM	0.168725	0.203168	YES	YES	4.34711e-08
PC27	40uM	0.1592	0.197522	YES	YES	3.69763e-08
PC27	40uM	0.168462	0.203168	YES	YES	3.98557e-10

## Sheet: Stand-alone Disruption
Compound	Compound Concentration	Average OD600	Control Average OD600	Experimental OD600 < Control OD600?	Bonferroni Correction Pass (α=0.05)?	Welch’s t-test
CB01	40uM	0.275025	0.27535	YES		0.826413
CB01	40uM	0.254087	0.25486	YES		0.410088
CB02	40uM	0.268457	0.27535	YES		0.0543877
CB02	40uM	0.272512	0.25486			0.0464823
CB03	40uM	0.270613	0.27535	YES		0.292103
CB03	40uM	0.242687	0.25486	YES		0.0795533
CB04	40uM	0.237337	0.25486	YES		0.000669989
CB04	40uM	0.263013	0.27535	YES	YES	0.000375098
CB05	40uM	0.265562	0.276785	YES		0.020157
CB05	40uM	0.268613	0.27535	YES		0.112976
CB05	40uM	0.265937	0.25486			0.253363
CB06	40uM	0.2418	0.25486	YES		0.00450991
CB06	40uM	0.263537	0.27535	YES		0.0852857
CB07	40uM	0.272238	0.27535	YES		0.367478
CB07	40uM	0.256275	0.25486			0.823944
CB08	40uM	0.239862	0.25486	YES		0.000611007
CB08	40uM	0.2681	0.27535	YES		0.0749229
CB09	40uM	0.259888	0.27535	YES	YES	0.00040797
CB09	40uM	0.27265	0.276785	YES		0.650815
CB09	40uM	0.24765	0.25486	YES		0.0298776
CB10	40uM	0.262987	0.27535	YES		0.0733223
CB10	40uM	0.267138	0.25486			0.195085
CB11	40uM	0.24975	0.25486	YES		0.217894
CB11	40uM	0.26735	0.27535	YES		0.0523699
PC12	40uM	0.253488	0.27535	YES		0.00244926
PC12	40uM	0.226037	0.25486	YES	YES	3.93094e-05
CB13	40uM	0.269525	0.27535	YES		0.298548
CB13	40uM	0.258012	0.25486			0.893865
CB14	40uM	0.25555	0.25486			0.799507
CB14	40uM	0.280012	0.27535			0.365388
CB15	40uM	0.25125	0.25486	YES		0.414641
CB15	40uM	0.269387	0.27535	YES		0.286353
CB16	40uM	0.25425	0.25486	YES		0.517431
CB16	40uM	0.271162	0.27535	YES		0.436474
CB17	40uM	0.259912	0.27535	YES	YES	0.000138662
CB17	40uM	0.235925	0.25486	YES	YES	0.000126801
CB18	40uM	0.2398	0.25486	YES		0.0126432
CB18	40uM	0.273225	0.276785	YES		0.724388
CB18	40uM	0.2671	0.27535	YES		0.0273586
CB19	40uM	0.2631	0.27535	YES		0.011731
CB19	40uM	0.260537	0.276785	YES		0.0214332
CB19	40uM	0.256013	0.25486			0.837019
CB20	40uM	0.26695	0.27535	YES		0.0174901
CB20	40uM	0.246425	0.25486	YES		0.108755
CB20	40uM	0.263825	0.276785	YES		0.033565
CB21	40uM	0.276037	0.27535			0.999566
CB21	40uM	0.2663	0.25486			0.188037
CB22	40uM	0.246262	0.25486	YES		0.00161669
CB22	40uM	0.27785	0.27535			0.758264
CB23	40uM	0.264737	0.27535	YES		0.00625011
CB23	40uM	0.2502	0.25486	YES		0.320285
CB23	40uM	0.269125	0.276785	YES		0.0438114
CB24	40uM	0.274325	0.27535	YES		0.779771
CB24	40uM	0.264125	0.25486			0.412551
CB25	40uM	0.27075	0.25486			0.00614383
CB25	40uM	0.278688	0.27535			0.484929
PC26	40uM	0.260813	0.27535	YES		0.0419429
PC26	40uM	0.237112	0.25486	YES		0.0257905
PC27	40uM	0.238825	0.25486	YES		0.0026721
PC27	40uM	0.24755	0.27535	YES	YES	4.11958e-06
CB28	40uM	0.256687	0.276785	YES		0.0073514
CB28	40uM	0.29385	0.27535		YES	0.000369858
CB28	40uM	0.260575	0.25486			0.581
CB29	40uM	0.270625	0.27535	YES		0.3366
CB29	40uM	0.26055	0.25486			0.49806
CB30	40uM	0.279362	0.27535			0.350181
CB30	40uM	0.26925	0.25486			0.05648
CB31	40uM	0.260837	0.27535	YES		0.00517762
CB31	40uM	0.262075	0.276785	YES		0.02452
CB31	40uM	0.262725	0.25486			0.408756
CB32	40uM	0.2647	0.276785	YES		0.0133876
CB32	40uM	0.24355	0.27535	YES	YES	4.36232e-05
CB32	40uM	0.258912	0.25486			0.63188
CB33	40uM	0.301137	0.276785		YES	0.000135904
CB33	40uM	0.269738	0.276785	YES		0.271246
CB34	40uM	0.260338	0.276785	YES		0.000998339
CB34	40uM	0.28725	0.276785			0.0143181
CB35	40uM	0.26385	0.276785	YES		0.00128858
CB35	40uM	0.284338	0.276785			0.0283404
CB36	40uM	0.270062	0.276785	YES		0.310433
CB36	40uM	0.277862	0.276785			0.54539
CB37	40uM	0.254738	0.276785	YES	YES	0.00013323
CB37	40uM	0.279062	0.276785			0.589411
CB38	40uM	0.263937	0.276785	YES		0.0194189
CB38	40uM	0.26895	0.276785	YES		0.0589165
CB39	40uM	0.262812	0.276785	YES		0.0010444
CB39	40uM	0.273825	0.276785	YES		0.704531
CB40	40uM	0.261938	0.276785	YES		0.0139613
CB40	40uM	0.255538	0.276785	YES	YES	2.19412e-08
CB41	40uM	0.2636	0.276785	YES		0.00243332
CB41	40uM	0.258713	0.276785	YES		0.00113466
CB42	40uM	0.261413	0.276785	YES		0.0106858
CB42	40uM	0.2631	0.276785	YES		0.00646339
CB43	40uM	0.2603	0.276785	YES		0.00623629
CB43	40uM	0.2674	0.276785	YES		0.0221868
CB44	40uM	0.249888	0.276785	YES		0.000881001
CB44	40uM	0.249288	0.276785	YES	YES	2.24353e-05
CB45	40uM	0.2633	0.276785	YES		0.0157206
CB45	40uM	0.283913	0.276785			0.0553007
CB46	40uM	0.26385	0.276785	YES		0.0127204
CB46	40uM	0.267037	0.276785	YES		0.0579859
CB47	40uM	0.261375	0.276785	YES		0.00763726
CB47	40uM	0.277075	0.276785			0.744703
CB48	40uM	0.256412	0.276785	YES	YES	3.41838e-05
CB48	40uM	0.2632	0.276785	YES		0.0243227

## Sheet: Combination Inhibition
Compound	Compound Concentration	Antifungal Agent	Average OD600	Compound Control Average OD600	Antifungal Control Average OD600	Experimental OD600 < Compound Control OD600?	Experimental OD600 < Antifungal Control OD600?	Bonferroni Correction Pass (α=0.05) versus Antifungal Control?	Bonferroni Correction Pass (α=0.05) versus Compound Control?	Welch’s t-test versus Antifungal Control	Welch’s t-test versus Compound Control
CB01	12.5	AmpB	0.2159	0.226214	0.199988	YES				0.0294078	0.165865
CB01	12.5	Caspofungin	0.189687	0.226214	0.184137	YES				0.484953	0.000397723
CB01	12.5	Fluconazole	0.152663	0.226214	0.141363	YES			YES	0.0749088	2.82848e-08
CB02	12.5	AmpB	0.205538	0.214587	0.199988	YES				0.306242	0.164675
CB02	12.5	Caspofungin	0.2003	0.214587	0.184137	YES				0.055456	0.0863625
CB02	12.5	Fluconazole	0.119175	0.214587	0.141363	YES	YES		YES	0.000375483	1.61716e-09
CB03	12.5	AmpB	0.198614	0.196075	0.199988		YES			0.735689	0.576342
CB03	12.5	Caspofungin	0.192813	0.196075	0.184137	YES				0.140409	0.511181
CB03	12.5	Fluconazole	0.121925	0.196075	0.141363	YES	YES		YES	0.00207058	1.05797e-09
CB04	12.5	AmpB	0.211888	0.203213	0.199988					0.115362	0.25657
CB04	12.5	Caspofungin	0.184512	0.203213	0.184137	YES				0.944818	0.0018928
CB04	12.5	Fluconazole	0.1187	0.203213	0.141363	YES	YES		YES	0.000704571	3.05978e-10
CB05	12.5	AmpB	0.18105	0.182925	0.199988	YES	YES			0.0008406	0.605781
CB05	12.5	Caspofungin	0.177087	0.182925	0.184137	YES	YES			0.194061	0.0519563
CB05	12.5	Fluconazole	0.1213	0.182925	0.141363	YES	YES		YES	0.000799552	5.36007e-11
CB06	12.5	AmpB	0.183862	0.183925	0.199988	YES	YES			0.00547864	0.989054
CB06	12.5	Caspofungin	0.172475	0.183925	0.184137	YES	YES			0.0442708	0.00385804
CB06	12.5	Fluconazole	0.116988	0.183925	0.141363	YES	YES	YES	YES	0.000162589	4.01684e-11
CB07	12.5	AmpB	0.214475	0.217925	0.199988	YES				0.0268453	0.673302
CB07	12.5	Caspofungin	0.200487	0.217925	0.184137	YES				0.00943406	0.0313491
CB07	12.5	Fluconazole	0.135163	0.217925	0.141363	YES	YES		YES	0.211412	5.10339e-07
CB08	12.5	AmpB	0.19085	0.192775	0.199988	YES	YES			0.113004	0.780953
CB08	12.5	Caspofungin	0.180375	0.192775	0.184137	YES	YES			0.472452	0.0559593
CB08	12.5	Fluconazole	0.121875	0.192775	0.141363	YES	YES		YES	0.0095642	1.59245e-07
CB09	12.5	AmpB	0.205188	0.197388	0.199988					0.441951	0.266078
CB09	12.5	Caspofungin	0.192625	0.197388	0.184137	YES				0.143612	0.315866
CB09	12.5	Fluconazole	0.14085	0.197388	0.141363	YES	YES		YES	0.905595	4.14354e-08
CB10	12.5	AmpB	0.19635	0.184888	0.199988		YES			0.433877	0.00918062
CB10	12.5	Caspofungin	0.186438	0.184888	0.184137					0.666525	0.629252
CB10	12.5	Fluconazole	0.1375	0.184888	0.141363	YES	YES		YES	0.39929	4.49173e-10
CB11	12.5	AmpB	0.199162	0.1894	0.199988		YES			0.881738	0.171347
CB11	12.5	Caspofungin	0.174925	0.1894	0.184137	YES	YES			0.0941037	0.02787
CB11	12.5	Fluconazole	0.129175	0.1894	0.141363	YES	YES		YES	0.0156016	2.14102e-06
CB13	12.5	AmpB	0.199475	0.187763	0.193725					0.238805	0.0258336
CB13	12.5	Caspofungin	0.188575	0.187763	0.189288		YES			0.891889	0.86544
CB13	12.5	Fluconazole	0.12255	0.187763	0.141287	YES	YES		YES	0.000369411	1.85232e-10
CB14	12.5	AmpB	0.197638	0.204363	0.193725	YES				0.312251	0.0943523
CB14	12.5	Caspofungin	0.194013	0.204363	0.189288	YES				0.344784	0.0321564
CB14	12.5	Fluconazole	0.134713	0.204363	0.141287	YES	YES		YES	0.132823	6.64561e-11
CB15	12.5	AmpB	0.188525	0.194263	0.193725	YES	YES			0.390208	0.388239
CB15	12.5	Caspofungin	0.173238	0.194263	0.189288	YES	YES			0.00340089	0.000883031
CB15	12.5	Fluconazole	0.12705	0.194263	0.141287	YES	YES		YES	0.0430259	1.81968e-07
CB16	12.5	AmpB	0.17715	0.193387	0.193725	YES	YES			0.000734707	0.0196738
CB16	12.5	Caspofungin	0.172775	0.193387	0.189288	YES	YES			0.00918847	0.00866989
CB16	12.5	Fluconazole	0.12765	0.193387	0.141287	YES	YES		YES	0.0232185	2.06014e-07
CB17	12.5	AmpB	0.182375	0.181763	0.193725		YES			0.0280564	0.893789
CB17	12.5	Caspofungin	0.174975	0.181763	0.189288	YES	YES			0.00836426	0.111227
CB17	12.5	Fluconazole	0.124712	0.181763	0.141287	YES	YES		YES	0.00178038	9.40222e-10
CB18	12.5	AmpB	0.208062	0.212425	0.193725	YES				0.0315869	0.4562
CB18	12.5	Caspofungin	0.20035	0.212425	0.189288	YES				0.113394	0.0696696
CB18	12.5	Fluconazole	0.137413	0.212425	0.141287	YES	YES		YES	0.435523	5.37295e-10
CB19	12.5	AmpB	0.204625	0.189762	0.193725				YES	0.0123881	0.000289329
CB19	12.5	Caspofungin	0.187975	0.189762	0.189288	YES	YES			0.797033	0.660405
CB19	12.5	Fluconazole	0.13985	0.189762	0.141287	YES	YES		YES	0.738304	2.55469e-09
CB20	12.5	AmpB	0.207725	0.20465	0.193725					0.0532343	0.666911
CB20	12.5	Caspofungin	0.19195	0.20465	0.189288	YES				0.604124	0.0314396
CB20	12.5	Fluconazole	0.136362	0.20465	0.141287	YES	YES		YES	0.39759	2.88103e-08
CB21	12.5	AmpB	0.18625	0.19105	0.193725	YES	YES			0.167439	0.406694
CB21	12.5	Caspofungin	0.189613	0.19105	0.189288	YES				0.946858	0.773054
CB21	12.5	Fluconazole	0.131163	0.19105	0.141287	YES	YES		YES	0.0674556	2.96237e-08
CB22	12.5	AmpB	0.192913	0.19515	0.193725	YES	YES			0.859546	0.731458
CB22	12.5	Caspofungin	0.1928	0.19515	0.189288	YES				0.481542	0.714731
CB22	12.5	Fluconazole	0.122912	0.19515	0.141287	YES	YES		YES	0.000608015	2.31458e-07
CB23	12.5	AmpB	0.19805	0.207088	0.205688	YES	YES			0.172573	0.129467
CB23	12.5	Caspofungin	0.17775	0.207088	0.1869	YES	YES		YES	0.151024	0.000107716
CB23	12.5	Fluconazole	0.124763	0.207088	0.14565	YES	YES		YES	0.0331747	9.95587e-07
CB24	12.5	AmpB	0.195025	0.197487	0.205688	YES	YES			0.0753998	0.722776
CB24	12.5	Caspofungin	0.166463	0.197487	0.1869	YES	YES			0.00570441	0.000497556
CB24	12.5	Fluconazole	0.136625	0.197487	0.14565	YES	YES		YES	0.189988	9.93023e-07
CB25	12.5	AmpB	0.194825	0.18785	0.205688		YES			0.0402601	0.135781
CB25	12.5	Caspofungin	0.167	0.18785	0.1869	YES	YES		YES	0.00459564	0.000271484
CB25	12.5	Fluconazole	0.1355	0.18785	0.14565	YES	YES		YES	0.0977426	5.69203e-08
CB28	12.5	AmpB	0.174413	0.180825	0.205688	YES	YES	YES		1.8346e-05	0.0776508
CB28	12.5	Caspofungin	0.159525	0.180825	0.1869	YES	YES		YES	0.000691192	5.63478e-06
CB28	12.5	Fluconazole	0.128775	0.180825	0.14565	YES	YES		YES	0.00760412	4.09545e-09
CB29	12.5	AmpB	0.193038	0.194825	0.205688	YES	YES			0.0168083	0.726533
CB29	12.5	Caspofungin	0.174488	0.194825	0.1869	YES	YES			0.0843768	0.00582151
CB29	12.5	Fluconazole	0.130437	0.194825	0.14565	YES	YES		YES	0.0504767	4.56375e-07
CB30	12.5	AmpB	0.191662	0.1861	0.205688		YES			0.0145954	0.169362
CB30	12.5	Caspofungin	0.173262	0.1861	0.1869	YES	YES			0.0341218	0.00225183
CB30	12.5	Fluconazole	0.142825	0.1861	0.14565	YES	YES		YES	0.694271	4.67272e-05
CB31	12.5	AmpB	0.197462	0.175037	0.205688		YES			0.142044	0.000494265
CB31	12.5	Caspofungin	0.167975	0.175037	0.1869	YES	YES			0.0076057	0.157631
CB31	12.5	Fluconazole	0.1268	0.175037	0.14565	YES	YES		YES	0.016448	6.37713e-06
CB32	12.5	AmpB	0.185475	0.185738	0.205688	YES	YES			0.00209666	0.959631
CB32	12.5	Caspofungin	0.17915	0.185738	0.1869	YES	YES			0.262949	0.262398
CB32	12.5	Fluconazole	0.128262	0.185738	0.14565	YES	YES		YES	0.00759292	1.06753e-08
CB33	12.5	AmpB	0.191487	0.18535	0.205688		YES			0.0261853	0.202778
CB33	12.5	Caspofungin	0.169938	0.18535	0.1869	YES	YES			0.0262213	0.0134736
CB33	12.5	Fluconazole	0.1312	0.18535	0.14565	YES	YES		YES	0.0157415	2.72035e-09
CB34	12.5	AmpB	0.214688	0.219613	0.197088	YES				0.0186327	0.485872
CB34	12.5	Caspofungin	0.189413	0.219613	0.20145	YES	YES			0.118542	0.00147095
CB34	12.5	Fluconazole	0.126425	0.219613	0.13165	YES	YES		YES	0.438615	1.6527e-08
CB35	12.5	AmpB	0.2004	0.202862	0.197088	YES				0.533508	0.564459
CB35	12.5	Caspofungin	0.187725	0.202862	0.20145	YES	YES			0.0178949	0.0033516
CB35	12.5	Fluconazole	0.119537	0.202862	0.13165	YES	YES		YES	0.00136647	3.73949e-14
CB36	12.5	AmpB	0.2012	0.207913	0.197088	YES				0.334865	0.247421
CB36	12.5	Caspofungin	0.045725	0.207913	0.20145	YES	YES	YES	YES	1.33867e-10	2.80992e-09
CB36	12.5	Fluconazole	0.125675	0.207913	0.13165	YES	YES		YES	0.0511425	1.85787e-07
CB37	12.5	AmpB	0.194225	0.195162	0.197088	YES	YES			0.575658	0.860074
CB37	12.5	Caspofungin	0.188675	0.195162	0.20145	YES	YES			0.0301048	0.251825
CB37	12.5	Fluconazole	0.120225	0.195162	0.13165	YES	YES		YES	0.113398	2.697e-07
CB38	12.5	AmpB	0.194563	0.192586	0.197088		YES			0.644746	0.717323
CB38	12.5	Caspofungin	0.1904	0.192586	0.20145	YES	YES			0.0417631	0.657909
CB38	12.5	Fluconazole	0.123725	0.192586	0.13165	YES	YES		YES	0.0605335	2.99038e-09
CB39	12.5	AmpB	0.1761	0.188125	0.197088	YES	YES			0.000971356	0.140321
CB39	12.5	Caspofungin	0.167637	0.188125	0.20145	YES	YES	YES		1.0074e-05	0.020077
CB39	12.5	Fluconazole	0.12015	0.188125	0.13165	YES	YES		YES	0.00258534	6.97033e-06
CB40	12.5	AmpB	0.208612	0.206687	0.197088					0.0900386	0.752352
CB40	12.5	Caspofungin	0.198675	0.206687	0.20145	YES	YES			0.525066	0.046234
CB40	12.5	Fluconazole	0.13035	0.206687	0.13165	YES	YES		YES	0.807534	1.19875e-08
CB41	12.5	AmpB	0.205338	0.19945	0.197088					0.173987	0.340947
CB41	12.5	Caspofungin	0.190513	0.19945	0.20145	YES	YES			0.0832326	0.158588
CB41	12.5	Fluconazole	0.134325	0.19945	0.13165	YES			YES	0.451564	7.56801e-09
CB42	12.5	AmpB	0.201325	0.1966	0.197088					0.412055	0.376495
CB42	12.5	Caspofungin	0.186188	0.1966	0.20145	YES	YES			0.00718793	0.0531903
CB42	12.5	Fluconazole	0.131675	0.1966	0.13165	YES			YES	0.993219	2.52487e-08
CB43	12.5	AmpB	0.187912	0.187225	0.197088		YES			0.126853	0.894893
CB43	12.5	Caspofungin	0.170412	0.187225	0.20145	YES	YES			0.000440363	0.0185888
CB43	12.5	Fluconazole	0.1238	0.187225	0.13165	YES	YES		YES	0.0123278	4.57948e-10
CB44	12.5	AmpB	0.19545	0.182563	0.197088		YES			0.755632	0.0191759
CB44	12.5	Caspofungin	0.162763	0.182563	0.20145	YES	YES	YES		2.49265e-06	0.000877682
CB44	12.5	Fluconazole	0.123825	0.182563	0.13165	YES	YES		YES	0.0203991	2.02047e-09
CB45	12.5	AmpB	0.183425	0.205338	0.187412	YES	YES			0.493588	0.00992757
CB45	12.5	Caspofungin	0.170212	0.205338	0.172762	YES	YES		YES	0.602476	9.89941e-05
CB45	12.5	Fluconazole	0.11815	0.205338	0.143025	YES	YES		YES	0.00328338	4.77887e-09
CB46	12.5	AmpB	0.195388	0.200862	0.187412	YES				0.0415869	0.312585
CB46	12.5	Caspofungin	0.174563	0.200862	0.172762	YES			YES	0.727701	0.000296745
CB46	12.5	Fluconazole	0.1359	0.200862	0.143025	YES	YES		YES	0.294602	1.92475e-08
CB47	12.5	AmpB	0.1978	0.192637	0.187412					0.0432236	0.377355
CB47	12.5	Caspofungin	0.167963	0.192637	0.172762	YES	YES		YES	0.348155	0.000255533
CB47	12.5	Fluconazole	0.137012	0.192637	0.143025	YES	YES		YES	0.416171	2.85041e-07
CB48	12.5	AmpB	0.182762	0.1843	0.187412	YES	YES			0.288336	0.794222
CB48	12.5	Caspofungin	0.173688	0.1843	0.172762	YES				0.838772	0.0568156
CB48	12.5	Fluconazole	0.124875	0.1843	0.143025	YES	YES		YES	0.0158783	8.81427e-08
PC12	12.5	AmpB	0.206663	0.206013	0.193725					0.0203508	0.910171
PC12	12.5	Caspofungin	0.192775	0.206013	0.189288	YES				0.436701	0.0168644
PC12	12.5	Fluconazole	0.121375	0.206013	0.141287	YES	YES		YES	0.00503621	3.48175e-09
PC26	12.5	AmpB	0.177712	0.170175	0.205688		YES			0.00304	0.337195
PC26	12.5	Caspofungin	0.173937	0.170175	0.1869		YES			0.0416291	0.444395
PC26	12.5	Fluconazole	0.10755	0.170175	0.14565	YES	YES	YES	YES	9.46504e-06	1.07722e-08
PC27	12.5	AmpB	0.187138	0.177788	0.205688		YES			0.00937514	0.11896
PC27	12.5	Caspofungin	0.178313	0.177788	0.1869		YES			0.191367	0.913772
PC27	12.5	Fluconazole	0.134375	0.177788	0.14565	YES	YES		YES	0.0680092	3.2977e-07

## Sheet: Combination Disruption
Compound	Compound Concentration	Antifungal Agent	Average OD600	Compound Control Average OD600	Antifungal Control Average OD600	Experimental OD600 < Compound Control OD600?	Experimental OD600 < Antifungal Control OD600?	Bonferroni Correction Pass (α=0.05) versus Antifungal Control?	Bonferroni Correction Pass (α=0.05) versus Compound Control?	Welch’s t-test versus Antifungal Control	Welch’s t-test versus Compound Control
CB01	12.5	AmpB	0.284013	0.2965	0.265463	YES		YES		0.00022197	0.139137
CB01	12.5	Caspofungin	0.281075	0.2965	0.262775	YES				0.0293587	0.1289
CB01	12.5	Fluconazole	0.263388	0.2965	0.260725	YES				0.760408	0.0034511
CB02	12.5	AmpB	0.298913	0.317062	0.265463	YES				0.00231788	0.147316
CB02	12.5	Caspofungin	0.290888	0.317062	0.262775	YES				0.0019801	0.0344721
CB02	12.5	Fluconazole	0.263713	0.317062	0.260725	YES				0.676069	0.00042376
CB03	12.5	AmpB	0.304125	0.299343	0.265463			YES		4.07458e-05	0.583769
CB03	12.5	Caspofungin	0.29305	0.299343	0.262775	YES		YES		1.99677e-05	0.413186
CB03	12.5	Fluconazole	0.268175	0.299343	0.260725	YES				0.319495	0.00281844
CB04	12.5	AmpB	0.2648	0.272125	0.265463	YES	YES			0.900907	0.30829
CB04	12.5	Caspofungin	0.251237	0.272125	0.262775	YES	YES			0.124665	0.0186379
CB04	12.5	Fluconazole	0.243275	0.272125	0.260725	YES	YES			0.0907368	0.007414
CB05	12.5	AmpB	0.2674	0.261825	0.265463					0.84801	0.621401
CB05	12.5	Caspofungin	0.245775	0.261825	0.262775	YES	YES			0.00377083	0.0279249
CB05	12.5	Fluconazole	0.244225	0.261825	0.260725	YES	YES			0.0438649	0.0247088
CB06	12.5	AmpB	0.268887	0.258438	0.265463					0.540814	0.0782375
CB06	12.5	Caspofungin	0.261362	0.258438	0.262775		YES			0.778358	0.458864
CB06	12.5	Fluconazole	0.246275	0.258438	0.260725	YES	YES			0.0673978	0.0186985
CB07	12.5	AmpB	0.272138	0.269463	0.265463					0.115045	0.782156
CB07	12.5	Caspofungin	0.266312	0.269463	0.262775	YES				0.526193	0.751659
CB07	12.5	Fluconazole	0.258088	0.269463	0.260725	YES	YES			0.737668	0.281994
CB08	12.5	AmpB	0.256437	0.2683	0.265463	YES	YES			0.180467	0.128785
CB08	12.5	Caspofungin	0.263687	0.2683	0.262775	YES				0.869548	0.455785
CB08	12.5	Fluconazole	0.257362	0.2683	0.260725	YES	YES			0.642306	0.0806221
CB09	12.5	AmpB	0.2691	0.254737	0.265463					0.409438	0.0614556
CB09	12.5	Caspofungin	0.254463	0.254737	0.262775	YES	YES			0.195884	0.97188
CB09	12.5	Fluconazole	0.24575	0.254737	0.260725	YES	YES			0.0930127	0.293532
CB10	12.5	AmpB	0.260975	0.262325	0.265463	YES	YES			0.424245	0.857522
CB10	12.5	Caspofungin	0.26205	0.262325	0.262775	YES	YES			0.92157	0.974046
CB10	12.5	Fluconazole	0.249475	0.262325	0.260725	YES	YES			0.198842	0.130527
CB11	12.5	AmpB	0.265788	0.257488	0.265463					0.956379	0.227832
CB11	12.5	Caspofungin	0.273975	0.257488	0.262775					0.142399	0.0408742
CB11	12.5	Fluconazole	0.2525	0.257488	0.260725	YES	YES			0.337384	0.480414
CB13	12.5	AmpB	0.267938	0.291712	0.265775	YES				0.712216	0.0203334
CB13	12.5	Caspofungin	0.261438	0.291712	0.265688	YES	YES			0.418334	0.00459159
CB13	12.5	Fluconazole	0.24335	0.291712	0.260675	YES	YES		YES	0.00840127	0.000163642
CB14	12.5	AmpB	0.274212	0.289688	0.265775	YES				0.187626	0.0313539
CB14	12.5	Caspofungin	0.231937	0.289688	0.265688	YES	YES	YES	YES	1.18725e-05	1.77868e-07
CB14	12.5	Fluconazole	0.249575	0.289688	0.260675	YES	YES		YES	0.0796133	3.73458e-05
CB15	12.5	AmpB	0.264963	0.243125	0.265775		YES			0.915693	0.0299387
CB15	12.5	Caspofungin	0.209525	0.243125	0.265688	YES	YES	YES		2.75003e-06	0.00124829
CB15	12.5	Fluconazole	0.24375	0.243125	0.260675		YES			0.00157027	0.930558
CB16	12.5	AmpB	0.263425	0.243012	0.265775		YES			0.830213	0.0884388
CB16	12.5	Caspofungin	0.23245	0.243012	0.265688	YES	YES	YES		0.000136307	0.101186
CB16	12.5	Fluconazole	0.234225	0.243012	0.260675	YES	YES	YES		9.9048e-06	0.070813
CB17	12.5	AmpB	0.269	0.252975	0.265775					0.510419	0.00209313
CB17	12.5	Caspofungin	0.243925	0.252975	0.265688	YES	YES			0.00569531	0.153715
CB17	12.5	Fluconazole	0.241375	0.252975	0.260675	YES	YES			0.00467347	0.0562284
CB18	12.5	AmpB	0.263175	0.269437	0.265775	YES	YES			0.576609	0.405848
CB18	12.5	Caspofungin	0.262575	0.269437	0.265688	YES	YES			0.509642	0.353125
CB18	12.5	Fluconazole	0.259288	0.269437	0.260675	YES	YES			0.808131	0.243411
CB19	12.5	AmpB	0.2597	0.27105	0.265775	YES	YES			0.396504	0.201226
CB19	12.5	Caspofungin	0.268513	0.27105	0.265688	YES				0.552434	0.705317
CB19	12.5	Fluconazole	0.25595	0.27105	0.260675	YES	YES			0.0680183	0.0393054
CB20	12.5	AmpB	0.271138	0.260967	0.265775					0.383877	0.0995214
CB20	12.5	Caspofungin	0.2571	0.260967	0.265688	YES	YES			0.161811	0.4726
CB20	12.5	Fluconazole	0.265875	0.260967	0.260675					0.140607	0.222955
CB21	12.5	AmpB	0.273	0.263938	0.265775					0.253267	0.155231
CB21	12.5	Caspofungin	0.27315	0.263938	0.265688					0.263977	0.156258
CB21	12.5	Fluconazole	0.2624	0.263938	0.260675	YES				0.831753	0.856128
CB22	12.5	AmpB	0.268087	0.26585	0.265775					0.704495	0.711315
CB22	12.5	Caspofungin	0.258875	0.26585	0.265688	YES	YES			0.182757	0.138345
CB22	12.5	Fluconazole	0.255988	0.26585	0.260675	YES	YES			0.114788	0.023393
CB23	12.5	AmpB	0.27075	0.288725	0.263413	YES				0.353911	0.0176538
CB23	12.5	Caspofungin	0.2677	0.288725	0.265538	YES				0.798392	0.00777555
CB23	12.5	Fluconazole	0.248775	0.288725	0.246738	YES			YES	0.783648	0.000126096
CB24	12.5	AmpB	0.282737	0.29915	0.263413	YES				0.0380176	0.0255679
CB24	12.5	Caspofungin	0.27805	0.29915	0.265538	YES				0.191091	0.00777555
CB24	12.5	Fluconazole	0.2626	0.29915	0.246738	YES			YES	0.0251299	1.29129e-05
CB25	12.5	AmpB	0.294025	0.310738	0.263413	YES				0.00182756	0.0621048
CB25	12.5	Caspofungin	0.286725	0.310738	0.265538	YES				0.0374562	0.02097
CB25	12.5	Fluconazole	0.268063	0.310738	0.246738	YES				0.016085	0.000522595
CB28	12.5	AmpB	0.279425	0.262375	0.263413					0.086104	0.0577618
CB28	12.5	Caspofungin	0.251875	0.262375	0.265538	YES	YES			0.145936	0.201115
CB28	12.5	Fluconazole	0.244125	0.262375	0.246738	YES	YES			0.70326	0.0317566
CB29	12.5	AmpB	0.27155	0.278037	0.263413	YES				0.289322	0.270251
CB29	12.5	Caspofungin	0.271712	0.278037	0.265538	YES				0.512953	0.402134
CB29	12.5	Fluconazole	0.26265	0.278037	0.246738	YES				0.0157035	0.0155752
CB30	12.5	AmpB	0.263575	0.292887	0.263413	YES				0.984441	0.0144198
CB30	12.5	Caspofungin	0.2649	0.292887	0.265538	YES	YES			0.945923	0.0207082
CB30	12.5	Fluconazole	0.262888	0.292887	0.246738	YES				0.0371278	0.0130995
CB31	12.5	AmpB	0.2838	0.260238	0.263413					0.098676	0.045747
CB31	12.5	Caspofungin	0.264625	0.260238	0.265538		YES			0.91594	0.487402
CB31	12.5	Fluconazole	0.247838	0.260238	0.246738	YES				0.860806	0.0497209
CB32	12.5	AmpB	0.256362	0.246263	0.263413		YES			0.478367	0.222802
CB32	12.5	Caspofungin	0.242662	0.246263	0.265538	YES	YES			0.0167044	0.415869
CB32	12.5	Fluconazole	0.227337	0.246263	0.246738	YES	YES			0.00518103	0.00041301
CB33	12.5	AmpB	0.270263	0.256288	0.263413					0.397966	0.0547599
CB33	12.5	Caspofungin	0.261788	0.256288	0.265538		YES			0.657862	0.407856
CB33	12.5	Fluconazole	0.247913	0.256288	0.246738	YES				0.866178	0.25353
CB34	12.5	AmpB	0.299343	0.298537	0.281312					0.0365251	0.914327
CB34	12.5	Caspofungin	0.297786	0.298537	0.279525	YES				0.0236584	0.914683
CB34	12.5	Fluconazole	0.283837	0.298537	0.269275	YES				0.0148459	0.0238845
CB35	12.5	AmpB	0.297957	0.316543	0.281312	YES				0.00972406	0.00619865
CB35	12.5	Caspofungin	0.284812	0.316543	0.279525	YES				0.447778	0.000542974
CB35	12.5	Fluconazole	0.272475	0.316543	0.269275	YES			YES	0.507238	6.51221e-06
CB36	12.5	AmpB	0.2959	0.335863	0.281312	YES				0.160869	0.00212215
CB36	12.5	Caspofungin	0.165437	0.335863	0.279525	YES	YES	YES	YES	7.44228e-11	2.50287e-10
CB36	12.5	Fluconazole	0.27225	0.335863	0.269275	YES			YES	0.673825	2.79888e-06
CB37	12.5	AmpB	0.266675	0.274975	0.281312	YES	YES			0.0423879	0.23339
CB37	12.5	Caspofungin	0.273612	0.274975	0.279525	YES	YES			0.385266	0.845811
CB37	12.5	Fluconazole	0.252143	0.274975	0.269275	YES	YES			0.00164166	0.00157761
CB38	12.5	AmpB	0.26515	0.273612	0.281312	YES	YES			0.0174567	0.195136
CB38	12.5	Caspofungin	0.269288	0.273612	0.279525	YES	YES			0.0857576	0.481702
CB38	12.5	Fluconazole	0.247286	0.273612	0.269275	YES	YES	YES		0.000139793	0.000594256
CB39	12.5	AmpB	0.279875	0.27455	0.281312		YES			0.816687	0.34651
CB39	12.5	Caspofungin	0.272575	0.27455	0.279525	YES	YES			0.261895	0.726328
CB39	12.5	Fluconazole	0.254413	0.27455	0.269275	YES	YES			0.0125276	0.00271006
CB40	12.5	AmpB	0.274687	0.2755	0.281312	YES	YES			0.235016	0.904242
CB40	12.5	Caspofungin	0.235425	0.2755	0.279525	YES	YES	YES	YES	3.00246e-06	0.000113187
CB40	12.5	Fluconazole	0.260188	0.2755	0.269275	YES	YES			0.19338	0.0876774
CB41	12.5	AmpB	0.272475	0.288429	0.281312	YES	YES			0.108177	0.00339772
CB41	12.5	Caspofungin	0.273913	0.288429	0.279525	YES	YES			0.349043	0.0175973
CB41	12.5	Fluconazole	0.270538	0.288429	0.269275	YES				0.842248	0.0180588
CB42	12.5	AmpB	0.265313	0.260325	0.281312		YES			0.0468682	0.57172
CB42	12.5	Caspofungin	0.265213	0.260325	0.279525		YES			0.0131731	0.493707
CB42	12.5	Fluconazole	0.253462	0.260325	0.269275	YES	YES			0.0398038	0.448367
CB43	12.5	AmpB	0.269025	0.256371	0.281312		YES			0.070647	0.0980303
CB43	12.5	Caspofungin	0.268625	0.256371	0.279525		YES			0.0790446	0.0969909
CB43	12.5	Fluconazole	0.246338	0.256371	0.269275	YES	YES	YES		4.30371e-05	0.135404
CB44	12.5	AmpB	0.25415	0.248913	0.281312		YES			0.00141149	0.388429
CB44	12.5	Caspofungin	0.257137	0.248913	0.279525		YES			0.00180777	0.116691
CB44	12.5	Fluconazole	0.249575	0.248913	0.269275		YES			0.000424532	0.875975
CB45	12.5	AmpB	0.27875	0.285957	0.242863	YES		YES		0.000132424	0.418725
CB45	12.5	Caspofungin	0.271788	0.285957	0.236812	YES		YES		3.068e-06	0.0942208
CB45	12.5	Fluconazole	0.260871	0.285957	0.23085	YES		YES		2.06607e-06	0.00885827
CB46	12.5	AmpB	0.264038	0.2761	0.242863	YES				0.000766387	0.0534805
CB46	12.5	Caspofungin	0.261525	0.2761	0.236812	YES		YES		1.62492e-05	0.0131527
CB46	12.5	Fluconazole	0.242225	0.2761	0.23085	YES			YES	0.005697	2.99372e-05
CB47	12.5	AmpB	0.271837	0.283462	0.242863	YES		YES		5.31256e-07	0.02539
CB47	12.5	Caspofungin	0.267575	0.283462	0.236812	YES		YES		1.73978e-06	0.00732319
CB47	12.5	Fluconazole	0.249887	0.283462	0.23085	YES		YES	YES	0.000179073	1.48333e-05
CB48	12.5	AmpB	0.257125	0.2614	0.242863	YES				0.0741614	0.574438
CB48	12.5	Caspofungin	0.244863	0.2614	0.236812	YES				0.0823439	0.00429582
CB48	12.5	Fluconazole	0.240112	0.2614	0.23085	YES				0.10294	0.00187402
PC12	12.5	AmpB	0.246175	0.264612	0.265775	YES	YES			0.0228093	0.0351943
PC12	12.5	Caspofungin	0.162237	0.264612	0.265688	YES	YES	YES	YES	1.15947e-11	6.06205e-11
PC12	12.5	Fluconazole	0.231363	0.264612	0.260675	YES	YES	YES	YES	9.2019e-07	2.30703e-05
PC26	12.5	AmpB	0.240788	0.241738	0.263413	YES	YES			0.0130523	0.845701
PC26	12.5	Caspofungin	0.151438	0.241738	0.265538	YES	YES	YES	YES	2.80962e-07	2.78713e-13
PC26	12.5	Fluconazole	0.231937	0.241738	0.246738	YES	YES			0.0393524	0.0739373
PC27	12.5	AmpB	0.239138	0.239825	0.263413	YES	YES			0.00745759	0.863472
PC27	12.5	Caspofungin	0.175288	0.239825	0.265538	YES	YES	YES	YES	3.64606e-07	9.33586e-09
PC27	12.5	Fluconazole	0.2271	0.239825	0.246738	YES	YES			0.00912357	0.0265035

## Sheet: Hit Summary
Assay Type	Antifungal Agent	Compound	Positive Control
Stand-alone Inhibition	N/A	PC12	yes
Stand-alone Inhibition	N/A	PC26	yes
Stand-alone Inhibition	N/A	PC27	yes
Stand-alone Disruption	N/A	CB17
Combination Inhibition	Fluconazole	CB06
Combination Inhibition	Caspofungin	CB36
Combination Inhibition	Fluconazole	PC26	Yes
Combination Disruption	Caspofungin	CB14
Combination Disruption	Caspofungin	CB36
Combination Disruption	Caspofungin	CB40
Combination Disruption	Fluconazole	PC12	Yes
Combination Disruption	Caspofungin	PC12	Yes
Combination Disruption	Caspofungin	PC26	Yes
Combination Disruption	Caspofungin	PC27	Yes

## Sheet: Hit Properties
Candidate Number	Chembridge Catalog Number	CAS Registry Number	Molecular Weight (Da)*	logP*	logSW*	tPSA (total Polar Surface Area, Å²)*	Rotatable Bonds*	H-bond Donors*	H-bond Acceptors*	Name*	SMILES
CB06	22164746	1185431-15-5	356	1.38	-3.74	79.5	5	2	4	N-(2,3-dihydro-1,4-benzodioxin-6-yl)-1-[3-(1H-pyrazol-4-yl)propanoyl]-3-piperidinamine	O=C(CCc1cn[nH]c1)N2CCCC(C2)Nc3ccc4OCCOc4c3
CB14	10068182	1060519-54-1	396	1.55	-0.86	95.7	11	2	7	2,2'-({[2-(ethylsulfonyl)-1-(3-phenylpropyl)-1H-imidazol-5-yl]methyl}imino)diethanol	CCS(=O)(=O)c1ncc(CN(CCO)CCO)n1CCCc2ccccc2
CB17	80338143	1070376-24-7	305	2.27	-3.51	47	6	1	4	1-[2-(2-methylphenoxy)-3-pyridinyl]-N-(3-pyridinylmethyl)methanamine	Cc1ccccc1Oc2ncccc2CNCc3cccnc3
CB36	29059737	1069485-01-3	408	2.48	-1.32	83.1	10	3	6	N-[2-({2-[3-(1-azocanyl)-2-hydroxypropoxy]-4-methoxybenzyl}amino)ethyl]acetamide	COc1ccc(CNCCNC(=O)C)c(OCC(O)CN2CCCCCCC2)c1
CB40	35558198	1066912-98-8	450	0.64	-4.15	90.2	5	0	7	1-{3-[5-(1,3-benzodioxol-5-yl)-1,3,4-oxadiazol-2-yl]propanoyl}-4-(2-ethoxyphenyl)piperazine	CCOc1ccccc1N2CCN(CC2)C(=O)CCc3oc(nn3)c4ccc5OCOc5c4
* Values listed for these compounds at the ChemBridge Online Chemical Store (www.hit2lead.com)

## Sheet: SNY425 Antifungal
Compound	Assay	Concentration (µg/mL)
Amphotericin B	Sustained Inhibition (significant p=0.05)	4
Amphotericin B	Sustained Inhibition (50% reduction and significant p=0.05)	8
Amphotericin B	Disruption (significant p=0.05)	16
Amphotericin B	Disruption (50% reduction and significant p=0.05)	> 32
Caspofungin	Sustained Inhibition (significant p=0.05)	0.25
Caspofungin	Sustained Inhibition (50% reduction and significant p=0.05)	1
Caspofungin	Disruption (significant p=0.05)	2
Caspofungin	Disruption (50% reduction and significant p=0.05)	> 8
Fluconazole	Sustained Inhibition (significant p=0.05)	0.5
Fluconazole	Sustained Inhibition (50% reduction and significant p=0.05)	> 1024
Fluconazole	Disruption (significant p=0.05)	> 1024
Fluconazole	Disruption (50% reduction and significant p=0.05)	> 1024
